# Supplementary material for: The impact of stroke, cognitive function and post-stroke cognitive impairment (PSCI) on healthcare utilisation in Ireland: a cross-sectional nationally representative study
Source: Springer Nature journal article supplement (doi:10.1186/s12913-022-07837-2), 2022-03-29
Supplement: MOESM1 [file 20264230]

**File name:** Additional File 1 Regression tests with other covariates

**File format:** PDF

**Title of data:** Regression tests with other covariates

**Description of data:** A number of covariates, which had negligible effects on the overall results, were excluded in the final regression models. This file presents these regression models, including the following covariates: (i) Cardiovascular (CVD) conditions (none/1 or more); (ii) Private health insurance (yes/no); (iii) Healthcare coverage (no cover, medical card/GP visit card only, private insurance only, dual cover); (iv) and long-term health problem (yes/no).

## Regression tests with other covariates

### 1. Multiple regressions including CVD conditions (no CVD/1+) as covariate

```
. tab CVD_w1
```

| see notes                | Freq. | Percent | Cum.   |
|--------------------------|-------|---------|--------|
| no CVD conditions        | 2,964 | 36.26   | 36.26  |
| at least 1 CVD condition | 5,211 | 63.74   | 100.00 |
| Total                    | 8,175 | 100.00  |        |

#### \*1a.GP visits - original model\*

```
. nbreg gpvisits i.strokew1 zMoca age i.sex i.edu3 i.emp2 i.medcard i.Disability2 MHcesd_capi, irr nolog
```

```
Negative binomial regression          Number of obs   =      5,753
                                      LR chi2(10)      =     1364.13
Dispersion = mean                    Prob > chi2      =      0.0000
Log likelihood = -13146.315          Pseudo R2       =      0.0493
```

| gpvisits              | IRR      | Std. Err. | z     | P> z  | [95% Conf. Interval] |
|-----------------------|----------|-----------|-------|-------|----------------------|
| strokew1              |          |           |       |       |                      |
| stroke                | 1.26931  | .1088749  | 2.78  | 0.005 | 1.072892 1.501687    |
| zMoca                 | 1.066888 | .0136849  | 5.05  | 0.000 | 1.040401 1.09405     |
| age                   | 1.003391 | .0016149  | 2.10  | 0.035 | 1.000231 1.006561    |
| sex                   |          |           |       |       |                      |
| Female                | 1.016083 | .0235785  | 0.69  | 0.492 | .9709047 1.063363    |
| edu3                  |          |           |       |       |                      |
| secondary edu         | .9953264 | .0292704  | -0.16 | 0.873 | .9395795 1.054381    |
| third level edu       | .9537152 | .0318513  | -1.42 | 0.156 | .8932871 1.018231    |
| emp2                  |          |           |       |       |                      |
| Employed              | .8489824 | .0245915  | -5.65 | 0.000 | .8021266 .8985752    |
| medcard               |          |           |       |       |                      |
| medcard/gp visit card | 1.597204 | .0444586  | 16.82 | 0.000 | 1.512401 1.686762    |
| Disability2           |          |           |       |       |                      |

|             |  |           |          |       |       |           |           |
|-------------|--|-----------|----------|-------|-------|-----------|-----------|
| Disability  |  | 1.434818  | .050219  | 10.32 | 0.000 | 1.339691  | 1.5367    |
| MHcesd_capi |  | 1.018779  | .0016563 | 11.44 | 0.000 | 1.015538  | 1.02203   |
| _cons       |  | 2.029435  | .225706  | 6.36  | 0.000 | 1.631953  | 2.523728  |
| -----+----- |  |           |          |       |       |           |           |
| /lnalpha    |  | -.8281074 | .0318193 |       |       | -.8904721 | -.7657428 |
| -----+----- |  |           |          |       |       |           |           |
| alpha       |  | .4368753  | .0139011 |       |       | .4104619  | .4649884  |
| -----       |  |           |          |       |       |           |           |

LR test of alpha=0: chibar2(01) = 4075.71                      Prob >= chibar2 = 0.000

**\*1b.GP visits - model including CVD conditions\***

```
. nbreg gpvisits i.strokew1 zMoca i.CVD_w1 age i.sex i.edu3 i.emp2 i.medcard i.Disability2
MHcesd_capi, irr nolog
```

```
Negative binomial regression          Number of obs   =      5,753
                                      LR chi2(11)     =     1576.37
Dispersion = mean                    Prob > chi2     =      0.0000
Log likelihood = -13040.195          Pseudo R2      =      0.0570
```

| gpvisits                 | IRR       | Std. Err. | z     | P> z  | [95% Conf. Interval] |           |
|--------------------------|-----------|-----------|-------|-------|----------------------|-----------|
| -----+-----              |           |           |       |       |                      |           |
| strokew1                 |           |           |       |       |                      |           |
| stroke                   | 1.230329  | .1033133  | 2.47  | 0.014 | 1.043624             | 1.450436  |
| zMoca                    | 1.075884  | .0135795  | 5.79  | 0.000 | 1.049595             | 1.102831  |
|                          |           |           |       |       |                      |           |
| CVD_w1                   |           |           |       |       |                      |           |
| at least 1 CVD condition | 1.438804  | .0355696  | 14.72 | 0.000 | 1.370751             | 1.510236  |
| age                      | 1.00019   | .0016001  | 0.12  | 0.906 | .9970587             | 1.003331  |
|                          |           |           |       |       |                      |           |
| sex                      |           |           |       |       |                      |           |
| Female                   | 1.024435  | .0234327  | 1.06  | 0.291 | .9795225             | 1.071408  |
|                          |           |           |       |       |                      |           |
| edu3                     |           |           |       |       |                      |           |
| secondary edu            | 1.003648  | .0290498  | 0.13  | 0.900 | .9482965             | 1.062231  |
| third level edu          | .9615744  | .0316433  | -1.19 | 0.234 | .9015125             | 1.025638  |
|                          |           |           |       |       |                      |           |
| emp2                     |           |           |       |       |                      |           |
| Employed                 | .8580756  | .0245463  | -5.35 | 0.000 | .8112896             | .9075596  |
|                          |           |           |       |       |                      |           |
| medcard                  |           |           |       |       |                      |           |
| medcard/gp visit card    | 1.57704   | .0433139  | 16.59 | 0.000 | 1.494391             | 1.664261  |
|                          |           |           |       |       |                      |           |
| Disability2              |           |           |       |       |                      |           |
| Disability               | 1.393207  | .047925   | 9.64  | 0.000 | 1.302372             | 1.490377  |
| MHcesd_capi              | 1.018333  | .0016222  | 11.40 | 0.000 | 1.015159             | 1.021518  |
| _cons                    | 1.932588  | .2117988  | 6.01  | 0.000 | 1.559026             | 2.395661  |
| -----+-----              |           |           |       |       |                      |           |
| /lnalpha                 | -.8881818 | .0325212  |       |       | -.9519223            | -.8244413 |
| -----+-----              |           |           |       |       |                      |           |
| alpha                    | .4114031  | .0133793  |       |       | .3859983             | .4384799  |
| -----+-----              |           |           |       |       |                      |           |

```
LR test of alpha=0: chibar2(01) = 3800.37          Prob >= chibar2 = 0.000
```

**\*2a. Emergency visits - original model\***

```
. nbreg emergency i.strokew1 zMoca age i.sex i.edu3 i.emp2 i.medcard i.Disability2 MHcesd_capi,
irr nolog
```

```
Negative binomial regression      Number of obs   =      5,757
                                   LR chi2(10)      =      136.19
Dispersion   = mean              Prob > chi2     =      0.0000
Log likelihood = -3156.5347      Pseudo R2      =      0.0211
```

| emergency             | IRR      | Std. Err. | z     | P> z  | [95% Conf. Interval] |          |
|-----------------------|----------|-----------|-------|-------|----------------------|----------|
| -----+-----           |          |           |       |       |                      |          |
| strokew1              |          |           |       |       |                      |          |
| stroke                | 1.562992 | .4085484  | 1.71  | 0.088 | .936402              | 2.608863 |
| zMoca                 | 1.055994 | .0455497  | 1.26  | 0.207 | .9703874             | 1.149152 |
| age                   | 1.000074 | .0053157  | 0.01  | 0.989 | .9897096             | 1.010547 |
|                       |          |           |       |       |                      |          |
| sex                   |          |           |       |       |                      |          |
| Female                | .9694865 | .0738441  | -0.41 | 0.684 | .83504               | 1.12558  |
|                       |          |           |       |       |                      |          |
| edu3                  |          |           |       |       |                      |          |
| secondary edu         | .981302  | .0952215  | -0.19 | 0.846 | .811345              | 1.186861 |
| third level edu       | 1.150641 | .1256091  | 1.29  | 0.199 | .9290065             | 1.42515  |
|                       |          |           |       |       |                      |          |
| emp2                  |          |           |       |       |                      |          |
| Employed              | .9343425 | .0892415  | -0.71 | 0.477 | .7748286             | 1.126696 |
|                       |          |           |       |       |                      |          |
| medcard               |          |           |       |       |                      |          |
| medcard/gp visit card | 1.425844 | .1318271  | 3.84  | 0.000 | 1.189525             | 1.709111 |
|                       |          |           |       |       |                      |          |
| Disability2           |          |           |       |       |                      |          |
| Disability            | 1.880549 | .1998814  | 5.94  | 0.000 | 1.526903             | 2.316103 |
| MHcesd_capi           | 1.021914 | .0050527  | 4.38  | 0.000 | 1.012059             | 1.031865 |
| _cons                 | .1416426 | .0518411  | -5.34 | 0.000 | .0691282             | .2902237 |
| -----+-----           |          |           |       |       |                      |          |
| /lnalpha              | 1.135652 | .078928   |       |       | .9809563             | 1.290348 |
| -----+-----           |          |           |       |       |                      |          |
| alpha                 | 3.113204 | .2457189  |       |       | 2.667005             | 3.634052 |
| -----+-----           |          |           |       |       |                      |          |

```
LR test of alpha=0: chibar2(01) = 644.50      Prob >= chibar2 = 0.000
```

**\*2b. Emergency visits - model including CVD conditions\***

```
. nbreg emergency i.strokew1 zMoca i.CVD_w1 age i.sex i.edu3 i.emp2 i.medcard i.Disability2
MHcesd_capi, irr nolog
```

```
Negative binomial regression      Number of obs   =      5,757
                                   LR chi2(11)      =      142.77
Dispersion = mean                 Prob > chi2     =      0.0000
Log likelihood = -3153.2471       Pseudo R2      =      0.0221
```

| emergency                | IRR      | Std. Err. | z     | P> z  | [95% Conf. Interval] |          |
|--------------------------|----------|-----------|-------|-------|----------------------|----------|
| -----+-----              |          |           |       |       |                      |          |
| strokew1                 |          |           |       |       |                      |          |
| stroke                   | 1.529209 | .3990983  | 1.63  | 0.104 | .9168897             | 2.550447 |
| zMoca                    | 1.060109 | .0457456  | 1.35  | 0.176 | .9741362             | 1.153669 |
|                          |          |           |       |       |                      |          |
| CVD_w1                   |          |           |       |       |                      |          |
| at least 1 CVD condition | 1.235639 | .1021309  | 2.56  | 0.010 | 1.050839             | 1.452938 |
| age                      | .9980633 | .0053591  | -0.36 | 0.718 | .9876147             | 1.008622 |
|                          |          |           |       |       |                      |          |
| sex                      |          |           |       |       |                      |          |
| Female                   | .9690903 | .073761   | -0.41 | 0.680 | .834788              | 1.125    |
|                          |          |           |       |       |                      |          |
| edu3                     |          |           |       |       |                      |          |
| secondary edu            | .983699  | .0953829  | -0.17 | 0.865 | .8134424             | 1.189591 |
| third level edu          | 1.147465 | .1251908  | 1.26  | 0.207 | .9265562             | 1.421043 |
|                          |          |           |       |       |                      |          |
| emp2                     |          |           |       |       |                      |          |
| Employed                 | .9394261 | .089723   | -0.65 | 0.513 | .7790508             | 1.132816 |
|                          |          |           |       |       |                      |          |
| medcard                  |          |           |       |       |                      |          |
| medcard/gp visit card    | 1.418072 | .1310527  | 3.78  | 0.000 | 1.183133             | 1.699664 |
|                          |          |           |       |       |                      |          |
| Disability2              |          |           |       |       |                      |          |
| Disability               | 1.835207 | .195486   | 5.70  | 0.000 | 1.489414             | 2.261284 |
| MHcesd_capi              | 1.021596 | .0050429  | 4.33  | 0.000 | 1.01176              | 1.031528 |
| _cons                    | .1404339 | .051381   | -5.37 | 0.000 | .0685551             | .2876763 |
| -----+-----              |          |           |       |       |                      |          |
| /lnalpha                 | 1.127702 | .0791117  |       |       | .9726459             | 1.282758 |
| -----+-----              |          |           |       |       |                      |          |
| alpha                    | 3.088551 | .2443406  |       |       | 2.644933             | 3.606574 |
| -----+-----              |          |           |       |       |                      |          |

```
LR test of alpha=0: chibar2(01) = 639.56      Prob >= chibar2 = 0.000
```

**\*3a.Nights in hospital - original model\***

```
. nbreg nights i.strokew1 zMoca age i.sex i.edu3 i.emp2 i.medcard i.Disability2 MHcesd_capi, irr
nolog
```

```
Negative binomial regression      Number of obs   =      5,758
                                   LR chi2(10)       =      100.85
Dispersion      = mean           Prob > chi2     =      0.0000
Log likelihood = -4043.7539      Pseudo R2      =      0.0123
```

| nights                | IRR      | Std. Err. | z     | P> z  | [95% Conf. Interval] |          |
|-----------------------|----------|-----------|-------|-------|----------------------|----------|
| -----+-----           |          |           |       |       |                      |          |
| strokew1              |          |           |       |       |                      |          |
| stroke                | 1.930541 | .8994416  | 1.41  | 0.158 | .7746455             | 4.811217 |
| zMoca                 | 1.047743 | .0662378  | 0.74  | 0.461 | .92564               | 1.185952 |
| age                   | 1.021044 | .0088188  | 2.41  | 0.016 | 1.003905             | 1.038475 |
|                       |          |           |       |       |                      |          |
| sex                   |          |           |       |       |                      |          |
| Female                | .9332921 | .1110405  | -0.58 | 0.562 | .7391694             | 1.178396 |
|                       |          |           |       |       |                      |          |
| edu3                  |          |           |       |       |                      |          |
| secondary edu         | 1.233323 | .1891828  | 1.37  | 0.172 | .9130801             | 1.665885 |
| third level edu       | 1.251192 | .2208183  | 1.27  | 0.204 | .8853166             | 1.768274 |
|                       |          |           |       |       |                      |          |
| emp2                  |          |           |       |       |                      |          |
| Employed              | .7813591 | .1203808  | -1.60 | 0.109 | .5777096             | 1.056798 |
|                       |          |           |       |       |                      |          |
| medcard               |          |           |       |       |                      |          |
| medcard/gp visit card | 1.518647 | .2199657  | 2.88  | 0.004 | 1.143315             | 2.017193 |
|                       |          |           |       |       |                      |          |
| Disability2           |          |           |       |       |                      |          |
| Disability            | 2.106449 | .3963532  | 3.96  | 0.000 | 1.456758             | 3.045892 |
| MHcesd_capi           | 1.0189   | .0088877  | 2.15  | 0.032 | 1.001628             | 1.036469 |
| _cons                 | .0973825 | .0587259  | -3.86 | 0.000 | .0298655             | .3175357 |
| -----+-----           |          |           |       |       |                      |          |
| /lnalpha              | 2.852873 | .0487549  |       |       | 2.757315             | 2.948431 |
| -----+-----           |          |           |       |       |                      |          |
| alpha                 | 17.33752 | .8452886  |       |       | 15.75748             | 19.07599 |
| -----+-----           |          |           |       |       |                      |          |

```
LR test of alpha=0: chibar2(01) = 1.0e+04      Prob >= chibar2 = 0.000
```

**\*3b.Nights in hospital - model including CVD conditions\***

```
. nbreg nights i.strokew1 zMoca i.CVD_w1 age i.sex i.edu3 i.emp2 i.medcard i.Disability2
MHcesd_capi, irr nolog
```

```
Negative binomial regression      Number of obs   =    5,758
                                   LR chi2(11)      =    108.87
Dispersion      = mean           Prob > chi2     =    0.0000
Log likelihood = -4039.7446      Pseudo R2      =    0.0133
```

| nights                   | IRR      | Std. Err. | z     | P> z  | [95% Conf. Interval] |          |
|--------------------------|----------|-----------|-------|-------|----------------------|----------|
| -----+-----              |          |           |       |       |                      |          |
| strokew1                 |          |           |       |       |                      |          |
| stroke                   | 1.982573 | .9217095  | 1.47  | 0.141 | .7970781             | 4.931257 |
| zMoca                    | 1.062547 | .0670968  | 0.96  | 0.337 | .938852              | 1.202539 |
|                          |          |           |       |       |                      |          |
| CVD_w1                   |          |           |       |       |                      |          |
| at least 1 CVD condition | 1.442755 | .1839679  | 2.87  | 0.004 | 1.123711             | 1.852382 |
| age                      | 1.017069 | .008892   | 1.94  | 0.053 | .9997894             | 1.034647 |
|                          |          |           |       |       |                      |          |
| sex                      |          |           |       |       |                      |          |
| Female                   | .9446874 | .1122316  | -0.48 | 0.632 | .7484502             | 1.192376 |
|                          |          |           |       |       |                      |          |
| edu3                     |          |           |       |       |                      |          |
| secondary edu            | 1.267437 | .1946099  | 1.54  | 0.123 | .9380539             | 1.712478 |
| third level edu          | 1.229091 | .2161316  | 1.17  | 0.241 | .8707695             | 1.734863 |
|                          |          |           |       |       |                      |          |
| emp2                     |          |           |       |       |                      |          |
| Employed                 | .7880019 | .1214622  | -1.55 | 0.122 | .5825371             | 1.065936 |
|                          |          |           |       |       |                      |          |
| medcard                  |          |           |       |       |                      |          |
| medcard/gp visit card    | 1.476801 | .2136654  | 2.69  | 0.007 | 1.112165             | 1.960988 |
|                          |          |           |       |       |                      |          |
| Disability2              |          |           |       |       |                      |          |
| Disability               | 2.023287 | .3807571  | 3.74  | 0.000 | 1.399175             | 2.925788 |
| MHcesd_capi              | 1.01768  | .0088037  | 2.03  | 0.043 | 1.00057              | 1.035082 |
| _cons                    | .0978585 | .05891    | -3.86 | 0.000 | .0300734             | .3184304 |
| -----+-----              |          |           |       |       |                      |          |
| /lnalpha                 | 2.844353 | .0488406  |       |       | 2.748627             | 2.940079 |
| -----+-----              |          |           |       |       |                      |          |
| alpha                    | 17.19043 | .8395916  |       |       | 15.62116             | 18.91733 |
| -----+-----              |          |           |       |       |                      |          |

```
LR test of alpha=0: chibar2(01) = 1.0e+04      Prob >= chibar2 = 0.000
```



**\*4a.Outpatient visits - original model\***

```
. nbreg outpatient i.strokew1 zMoca age i.sex i.edu3 i.emp2 i.medcard i.Disability2 MHcesd_capi,
irr nolog
```

```
Negative binomial regression      Number of obs   =      5,758
                                   LR chi2(10)       =      320.19
Dispersion = mean                 Prob > chi2     =      0.0000
Log likelihood = -8323.6887       Pseudo R2      =      0.0189
```

| outpatient            | IRR      | Std. Err. | z     | P> z  | [95% Conf. Interval] |          |
|-----------------------|----------|-----------|-------|-------|----------------------|----------|
| -----+-----           |          |           |       |       |                      |          |
| strokew1              |          |           |       |       |                      |          |
| stroke                | 1.491691 | .2666236  | 2.24  | 0.025 | 1.050838             | 2.117493 |
| zMoca                 | .9233992 | .0251754  | -2.92 | 0.003 | .8753515             | .9740841 |
| age                   | .9991229 | .0033752  | -0.26 | 0.795 | .9925296             | 1.00576  |
|                       |          |           |       |       |                      |          |
| sex                   |          |           |       |       |                      |          |
| Female                | .970144  | .0461093  | -0.64 | 0.524 | .883853              | 1.06486  |
|                       |          |           |       |       |                      |          |
| edu3                  |          |           |       |       |                      |          |
| secondary edu         | .9581131 | .0588409  | -0.70 | 0.486 | .8494575             | 1.080667 |
| third level edu       | 1.048307 | .072027   | 0.69  | 0.492 | .9162296             | 1.199424 |
|                       |          |           |       |       |                      |          |
| emp2                  |          |           |       |       |                      |          |
| Employed              | .6883726 | .0408307  | -6.30 | 0.000 | .6128225             | .7732367 |
|                       |          |           |       |       |                      |          |
| medcard               |          |           |       |       |                      |          |
| medcard/gp visit card | 1.308491 | .0735854  | 4.78  | 0.000 | 1.17193              | 1.460964 |
|                       |          |           |       |       |                      |          |
| Disability2           |          |           |       |       |                      |          |
| Disability            | 1.786977 | .12974    | 8.00  | 0.000 | 1.549955             | 2.060244 |
| MHcesd_capi           | 1.021031 | .0035114  | 6.05  | 0.000 | 1.014172             | 1.027936 |
| _cons                 | 1.027715 | .2380878  | 0.12  | 0.906 | .6526458             | 1.618334 |
| -----+-----           |          |           |       |       |                      |          |
| /lnalpha              | .7918733 | .0349612  |       |       | .7233506             | .860396  |
| -----+-----           |          |           |       |       |                      |          |
| alpha                 | 2.207528 | .0771779  |       |       | 2.061328             | 2.364097 |
| -----+-----           |          |           |       |       |                      |          |

```
LR test of alpha=0: chibar2(01) = 5125.52      Prob >= chibar2 = 0.000
```

**\*4b.Outpatient visits - model including CVD conditions\***

```
. nbreg outpatient i.strokew1 zMoca i.CVD_w1 age i.sex i.edu3 i.emp2 i.medcard i.Disability2
MHcesd_capi, irr nolog
```

```
Negative binomial regression      Number of obs   =      5,758
                                   LR chi2(11)      =      371.72
Dispersion = mean                 Prob > chi2     =      0.0000
Log likelihood = -8297.9233       Pseudo R2      =      0.0219
```

| outpatient               | IRR      | Std. Err. | z     | P> z  | [95% Conf. Interval] |          |
|--------------------------|----------|-----------|-------|-------|----------------------|----------|
| -----+-----              |          |           |       |       |                      |          |
| strokew1                 |          |           |       |       |                      |          |
| stroke                   | 1.416524 | .2513117  | 1.96  | 0.050 | 1.00048              | 2.005576 |
| zMoca                    | .9333502 | .0252937  | -2.55 | 0.011 | .885069              | .9842652 |
|                          |          |           |       |       |                      |          |
| CVD_w1                   |          |           |       |       |                      |          |
| at least 1 CVD condition | 1.448863 | .0740592  | 7.25  | 0.000 | 1.310743             | 1.601536 |
| age                      | .9953236 | .0033865  | -1.38 | 0.168 | .9887082             | 1.001983 |
|                          |          |           |       |       |                      |          |
| sex                      |          |           |       |       |                      |          |
| Female                   | .9818089 | .0464801  | -0.39 | 0.698 | .8948083             | 1.077268 |
|                          |          |           |       |       |                      |          |
| edu3                     |          |           |       |       |                      |          |
| secondary edu            | .963217  | .0588214  | -0.61 | 0.539 | .8545614             | 1.085688 |
| third level edu          | 1.057727 | .0722966  | 0.82  | 0.412 | .9251093             | 1.209355 |
|                          |          |           |       |       |                      |          |
| emp2                     |          |           |       |       |                      |          |
| Employed                 | .7035111 | .0416331  | -5.94 | 0.000 | .6264663             | .7900312 |
|                          |          |           |       |       |                      |          |
| medcard                  |          |           |       |       |                      |          |
| medcard/gp visit card    | 1.306792 | .0731684  | 4.78  | 0.000 | 1.170973             | 1.458364 |
|                          |          |           |       |       |                      |          |
| Disability2              |          |           |       |       |                      |          |
| Disability               | 1.732607 | .1251426  | 7.61  | 0.000 | 1.503902             | 1.996092 |
| MHcesd_capi              | 1.020224 | .0034795  | 5.87  | 0.000 | 1.013427             | 1.027067 |
| _cons                    | 1.004379 | .2314683  | 0.02  | 0.985 | .6393376             | 1.577846 |
| -----+-----              |          |           |       |       |                      |          |
| /lnalpha                 | .7695325 | .0352299  |       |       | .7004832             | .8385819 |
| -----+-----              |          |           |       |       |                      |          |
| alpha                    | 2.158757 | .0760528  |       |       | 2.014726             | 2.313085 |
| -----+-----              |          |           |       |       |                      |          |

```
LR test of alpha=0: chibar2(01) = 4994.43      Prob >= chibar2 = 0.000
```

**\*5a.Rehab services used - 3 services (new variable: OT, Psychology and Physiotherapy)\***

. logit SSused3 i.strokew1 zMoca age i.sex i.edu3 i.emp2 i.medcard i.Disability2 MHcesd\_capi, or  
nolog

```

Logistic regression                Number of obs    =    5,760
                                   LR chi2(10)       =    260.77
                                   Prob > chi2        =    0.0000
Log likelihood = -1259.2078        Pseudo R2       =    0.0938
  
```

| SSused3               | Odds Ratio | Std. Err. | z     | P> z  | [95% Conf. Interval] |
|-----------------------|------------|-----------|-------|-------|----------------------|
| -----+-----           |            |           |       |       |                      |
| strokew1              |            |           |       |       |                      |
| stroke                | 1.247889   | .4231788  | 0.65  | 0.514 | .641978 2.42567      |
| zMoca                 | .9854331   | .0581176  | -0.25 | 0.804 | .8778617 1.106186    |
| age                   | .9876777   | .0072565  | -1.69 | 0.091 | .9735571 1.002003    |
|                       |            |           |       |       |                      |
| sex                   |            |           |       |       |                      |
| Female                | 1.139399   | .129593   | 1.15  | 0.251 | .9117204 1.423934    |
|                       |            |           |       |       |                      |
| edu3                  |            |           |       |       |                      |
| secondary edu         | 1.447394   | .2076175  | 2.58  | 0.010 | 1.092668 1.917278    |
| third level edu       | 1.763759   | .2863017  | 3.50  | 0.000 | 1.283122 2.424433    |
|                       |            |           |       |       |                      |
| emp2                  |            |           |       |       |                      |
| Employed              | .6002524   | .0949352  | -3.23 | 0.001 | .4402596 .8183875    |
|                       |            |           |       |       |                      |
| medcard               |            |           |       |       |                      |
| medcard/gp visit card | 2.697211   | .3800268  | 7.04  | 0.000 | 2.046369 3.555053    |
|                       |            |           |       |       |                      |
| Disability2           |            |           |       |       |                      |
| Disability            | 2.593357   | .3499073  | 7.06  | 0.000 | 1.990739 3.378394    |
| MHcesd_capi           | 1.039322   | .0066217  | 6.05  | 0.000 | 1.026425 1.052382    |
| _cons                 | .0424572   | .0217686  | -6.16 | 0.000 | .0155426 .1159789    |
| -----                 |            |           |       |       |                      |

**\*5b. Rehab services used (3 services) - model including CVD conditions\***

. logit SSused3 i.strokew1 zMoca i.CVD\_w1 age i.sex i.edu3 i.emp2 i.medcard i.Disability2  
MHcesd\_capi, or nolog

```

Logistic regression                Number of obs   =    5,760
                                   LR chi2(11)       =    262.96
                                   Prob > chi2        =    0.0000
Log likelihood = -1258.1131        Pseudo R2      =    0.0946
    
```

|                          | SSused3 | Odds Ratio | Std. Err. | z     | P> z  | [95% Conf. Interval] |          |
|--------------------------|---------|------------|-----------|-------|-------|----------------------|----------|
| -----                    |         |            |           |       |       |                      |          |
| strokew1                 |         |            |           |       |       |                      |          |
| stroke                   |         | 1.229696   | .4163436  | 0.61  | 0.541 | .63329               | 2.387772 |
| zMoca                    |         | .9895971   | .0585067  | -0.18 | 0.860 | .8813205             | 1.111176 |
|                          |         |            |           |       |       |                      |          |
| CVD_w1                   |         |            |           |       |       |                      |          |
| at least 1 CVD condition |         | 1.20336    | .1519055  | 1.47  | 0.143 | .9396035             | 1.541156 |
| age                      |         | .9860614   | .0073258  | -1.89 | 0.059 | .971807              | 1.000525 |
|                          |         |            |           |       |       |                      |          |
| sex                      |         |            |           |       |       |                      |          |
| Female                   |         | 1.141191   | .1298287  | 1.16  | 0.246 | .9131051             | 1.426252 |
|                          |         |            |           |       |       |                      |          |
| edu3                     |         |            |           |       |       |                      |          |
| secondary edu            |         | 1.456619   | .2090895  | 2.62  | 0.009 | 1.099413             | 1.929884 |
| third level edu          |         | 1.774354   | .2882235  | 3.53  | 0.000 | 1.290542             | 2.439541 |
|                          |         |            |           |       |       |                      |          |
| emp2                     |         |            |           |       |       |                      |          |
| Employed                 |         | .6039991   | .0955388  | -3.19 | 0.001 | .4429918             | .8235252 |
|                          |         |            |           |       |       |                      |          |
| medcard                  |         |            |           |       |       |                      |          |
| medcard/gp visit card    |         | 2.686256   | .3784398  | 7.01  | 0.000 | 2.038122             | 3.540501 |
|                          |         |            |           |       |       |                      |          |
| Disability2              |         |            |           |       |       |                      |          |
| Disability               |         | 2.54289    | .3445207  | 6.89  | 0.000 | 1.94986              | 3.316284 |
| MHcesd_capi              |         | 1.039224   | .0066269  | 6.03  | 0.000 | 1.026316             | 1.052294 |
| _cons                    |         | .041506    | .0213053  | -6.20 | 0.000 | .015177              | .1135108 |

**\*6a.Rehab services used - 2 services only (original variable: OT and Psychology)\***

. logit RehabUsed2 i.strokew1 zMoca age i.sex i.edu3 i.emp2 i.medcard i.Disability2 MHcesd\_capi,  
or nolog

```

Logistic regression                Number of obs    =      5,760
                                   LR chi2(10)       =      160.85
                                   Prob > chi2        =      0.0000
Log likelihood = -533.39536        Pseudo R2       =      0.1310
  
```

| RehabUsed2            | Odds Ratio | Std. Err. | z     | P> z  | [95% Conf. Interval] |
|-----------------------|------------|-----------|-------|-------|----------------------|
| -----                 |            |           |       |       |                      |
| strokew1              |            |           |       |       |                      |
| stroke                | 3.023982   | 1.210921  | 2.76  | 0.006 | 1.37951 6.628779     |
| zMoca                 | .9380939   | .0918678  | -0.65 | 0.514 | .7742619 1.136592    |
| age                   | .9660501   | .0117159  | -2.85 | 0.004 | .9433582 .9892879    |
|                       |            |           |       |       |                      |
| sex                   |            |           |       |       |                      |
| Female                | .98947     | .1873641  | -0.06 | 0.955 | .6826857 1.434117    |
|                       |            |           |       |       |                      |
| edu3                  |            |           |       |       |                      |
| secondary edu         | 1.573118   | .3827416  | 1.86  | 0.063 | .9764793 2.53431     |
| third level edu       | 2.043387   | .5582288  | 2.62  | 0.009 | 1.196224 3.490509    |
|                       |            |           |       |       |                      |
| emp2                  |            |           |       |       |                      |
| Employed              | .4544699   | .1282731  | -2.79 | 0.005 | .2613698 .7902326    |
|                       |            |           |       |       |                      |
| medcard               |            |           |       |       |                      |
| medcard/gp visit card | 2.865971   | .6841755  | 4.41  | 0.000 | 1.795022 4.575872    |
|                       |            |           |       |       |                      |
| Disability2           |            |           |       |       |                      |
| Disability            | 3.386041   | .7127287  | 5.79  | 0.000 | 2.241416 5.115191    |
| MHcesd_capi           | 1.048094   | .0098247  | 5.01  | 0.000 | 1.029013 1.067528    |
| _cons                 | .0442429   | .0373463  | -3.69 | 0.000 | .0084591 .2313985    |
| -----                 |            |           |       |       |                      |

**\*6b. Rehab services used (2 services) - model including CVD conditions\***

. logit RehabUsed2 i.strokew1 zMoca i.CVD\_w1 age i.sex i.edu3 i.emp2 i.medcard i.Disability2  
MHcesd\_capi, or nolog

```

Logistic regression                Number of obs   =      5,760
                                   LR chi2(11)       =      161.40
                                   Prob > chi2        =      0.0000
Log likelihood = -533.12063        Pseudo R2      =      0.1315
    
```

| RehabUsed2               | Odds Ratio | Std. Err. | z     | P> z  | [95% Conf. Interval] |
|--------------------------|------------|-----------|-------|-------|----------------------|
| -----+-----              |            |           |       |       |                      |
| strokew1                 |            |           |       |       |                      |
| stroke                   | 2.985287   | 1.194223  | 2.73  | 0.006 | 1.362933 6.538794    |
| zMoca                    | .942024    | .0924501  | -0.61 | 0.543 | .7771863 1.141823    |
|                          |            |           |       |       |                      |
| CVD_w1                   |            |           |       |       |                      |
| at least 1 CVD condition | 1.16932    | .2488205  | 0.74  | 0.462 | .7705582 1.774439    |
| age                      | .9648015   | .0118178  | -2.93 | 0.003 | .9419149 .9882441    |
|                          |            |           |       |       |                      |
| sex                      |            |           |       |       |                      |
| Female                   | .9907469   | .1876009  | -0.05 | 0.961 | .6835734 1.435953    |
|                          |            |           |       |       |                      |
| edu3                     |            |           |       |       |                      |
| secondary edu            | 1.586559   | .3866118  | 1.89  | 0.058 | .9840929 2.557859    |
| third level edu          | 2.057371   | .5626951  | 2.64  | 0.008 | 1.20367 3.516559     |
|                          |            |           |       |       |                      |
| emp2                     |            |           |       |       |                      |
| Employed                 | .4577112   | .1292737  | -2.77 | 0.006 | .2631372 .7961607    |
|                          |            |           |       |       |                      |
| medcard                  |            |           |       |       |                      |
| medcard/gp visit card    | 2.857973   | .6822748  | 4.40  | 0.000 | 1.790002 4.563129    |
|                          |            |           |       |       |                      |
| Disability2              |            |           |       |       |                      |
| Disability               | 3.322225   | .7037876  | 5.67  | 0.000 | 2.193354 5.032103    |
| MHcesd_capi              | 1.048187   | .0098382  | 5.01  | 0.000 | 1.02908 1.067648     |
| _cons                    | .0429982   | .0363596  | -3.72 | 0.000 | .0081972 .2255449    |
| -----+-----              |            |           |       |       |                      |

\*\*\*\*\*

## 2. Multiple regressions including other covariates

### Insurance (ins2)

```
. tab ins2
```

| ins2                 | Freq. | Percent | Cum.   |
|----------------------|-------|---------|--------|
| no private insurance | 3,465 | 42.42   | 42.42  |
| private insurance    | 4,704 | 57.58   | 100.00 |
| Total                | 8,169 | 100.00  |        |

### \*1a.GP visits - original model\*

```
. nbreg gpvisits i.strokew1 zMoca age i.sex i.edu3 i.emp2 i.medcard i.Disability2 MHcesd_capi,
irr nolog
```

```
Negative binomial regression           Number of obs   =       5,753
                                         LR chi2(10)     =       1364.13
Dispersion = mean                       Prob > chi2     =       0.0000
Log likelihood = -13146.315             Pseudo R2      =       0.0493
```

| gpvisits              | IRR      | Std. Err. | z     | P> z  | [95% Conf. Interval] |
|-----------------------|----------|-----------|-------|-------|----------------------|
| strokew1              |          |           |       |       |                      |
| stroke                | 1.26931  | .1088749  | 2.78  | 0.005 | 1.072892 1.501687    |
| zMoca                 | 1.066888 | .0136849  | 5.05  | 0.000 | 1.040401 1.09405     |
| age                   | 1.003391 | .0016149  | 2.10  | 0.035 | 1.000231 1.006561    |
| sex                   |          |           |       |       |                      |
| Female                | 1.016083 | .0235785  | 0.69  | 0.492 | .9709047 1.063363    |
| edu3                  |          |           |       |       |                      |
| secondary edu         | .9953264 | .0292704  | -0.16 | 0.873 | .9395795 1.054381    |
| third level edu       | .9537152 | .0318513  | -1.42 | 0.156 | .8932871 1.018231    |
| emp2                  |          |           |       |       |                      |
| Employed              | .8489824 | .0245915  | -5.65 | 0.000 | .8021266 .8985752    |
| medcard               |          |           |       |       |                      |
| medcard/gp visit card | 1.597204 | .0444586  | 16.82 | 0.000 | 1.512401 1.686762    |
| Disability2           |          |           |       |       |                      |
| Disability            | 1.434818 | .050219   | 10.32 | 0.000 | 1.339691 1.5367      |
| MHcesd_capi           | 1.018779 | .0016563  | 11.44 | 0.000 | 1.015538 1.02203     |

|             |  |           |          |      |       |           |           |
|-------------|--|-----------|----------|------|-------|-----------|-----------|
| _cons       |  | 2.029435  | .225706  | 6.36 | 0.000 | 1.631953  | 2.523728  |
| -----+----- |  |           |          |      |       |           |           |
| /lnalpha    |  | -.8281074 | .0318193 |      |       | -.8904721 | -.7657428 |
| -----+----- |  |           |          |      |       |           |           |
| alpha       |  | .4368753  | .0139011 |      |       | .4104619  | .4649884  |
| -----       |  |           |          |      |       |           |           |

LR test of alpha=0: chibar2(01) = 4075.71                      Prob >= chibar2 = 0.000



**\*1b.GP visits - model including insurance\***

```
. nbreg gpvisits i.strokew1 zMoca i.ins2 age i.sex i.edu3 i.emp2 i.medcard i.Disability2
MHcesd_capi, irr nolog
```

```
Negative binomial regression          Number of obs   =      5,749
                                      LR chi2(11)      =     1353.30
Dispersion = mean                    Prob > chi2     =      0.0000
Log likelihood = -13137.446          Pseudo R2      =      0.0490
```

| gpvisits              | IRR       | Std. Err. | z     | P> z  | [95% Conf. Interval] |           |
|-----------------------|-----------|-----------|-------|-------|----------------------|-----------|
| -----+-----           |           |           |       |       |                      |           |
| strokew1              |           |           |       |       |                      |           |
| stroke                | 1.269977  | .1089374  | 2.79  | 0.005 | 1.073447             | 1.502488  |
| zMoca                 | 1.066563  | .0137304  | 5.01  | 0.000 | 1.039989             | 1.093817  |
|                       |           |           |       |       |                      |           |
| ins2                  |           |           |       |       |                      |           |
| private insurance     | .9964236  | .0275354  | -0.13 | 0.897 | .9438907             | 1.05188   |
| age                   | 1.003471  | .0016595  | 2.10  | 0.036 | 1.000224             | 1.006729  |
|                       |           |           |       |       |                      |           |
| sex                   |           |           |       |       |                      |           |
| Female                | 1.015687  | .0235792  | 0.67  | 0.503 | .9705083             | 1.062969  |
|                       |           |           |       |       |                      |           |
| edu3                  |           |           |       |       |                      |           |
| secondary edu         | .9949325  | .0298201  | -0.17 | 0.865 | .9381697             | 1.05513   |
| third level edu       | .9541238  | .0327592  | -1.37 | 0.171 | .8920296             | 1.02054   |
|                       |           |           |       |       |                      |           |
| emp2                  |           |           |       |       |                      |           |
| Employed              | .8491743  | .024612   | -5.64 | 0.000 | .8022803             | .8988093  |
|                       |           |           |       |       |                      |           |
| medcard               |           |           |       |       |                      |           |
| medcard/gp visit card | 1.593726  | .048097   | 15.44 | 0.000 | 1.502192             | 1.690838  |
|                       |           |           |       |       |                      |           |
| Disability2           |           |           |       |       |                      |           |
| Disability            | 1.432837  | .0502106  | 10.26 | 0.000 | 1.33773              | 1.534706  |
| MHcesd_capi           | 1.018631  | .0016614  | 11.32 | 0.000 | 1.01538              | 1.021893  |
| _cons                 | 2.028307  | .2259408  | 6.35  | 0.000 | 1.630478             | 2.523203  |
| -----+-----           |           |           |       |       |                      |           |
| /lnalpha              | -.8277287 | .0318298  |       |       | -.8901141            | -.7653434 |
| -----+-----           |           |           |       |       |                      |           |
| alpha                 | .4370408  | .0139109  |       |       | .4106089             | .4651742  |
| -----+-----           |           |           |       |       |                      |           |

```
LR test of alpha=0: chibar2(01) = 4070.53          Prob >= chibar2 = 0.000
```

**\*2a. Emergency visits - original model\***

```
. nbreg emergency i.strokew1 zMoca age i.sex i.edu3 i.emp2 i.medcard i.Disability2 MHcesd_capi,
irr nolog
```

```
Negative binomial regression      Number of obs   =      5,757
                                   LR chi2(10)      =      136.19
Dispersion = mean                 Prob > chi2     =      0.0000
Log likelihood = -3156.5347       Pseudo R2      =      0.0211
```

| emergency             | IRR      | Std. Err. | z     | P> z  | [95% Conf. Interval] |          |
|-----------------------|----------|-----------|-------|-------|----------------------|----------|
| -----+-----           |          |           |       |       |                      |          |
| strokew1              |          |           |       |       |                      |          |
| stroke                | 1.562992 | .4085484  | 1.71  | 0.088 | .936402              | 2.608863 |
| zMoca                 | 1.055994 | .0455497  | 1.26  | 0.207 | .9703874             | 1.149152 |
| age                   | 1.000074 | .0053157  | 0.01  | 0.989 | .9897096             | 1.010547 |
|                       |          |           |       |       |                      |          |
| sex                   |          |           |       |       |                      |          |
| Female                | .9694865 | .0738441  | -0.41 | 0.684 | .83504               | 1.12558  |
|                       |          |           |       |       |                      |          |
| edu3                  |          |           |       |       |                      |          |
| secondary edu         | .981302  | .0952215  | -0.19 | 0.846 | .811345              | 1.186861 |
| third level edu       | 1.150641 | .1256091  | 1.29  | 0.199 | .9290065             | 1.42515  |
|                       |          |           |       |       |                      |          |
| emp2                  |          |           |       |       |                      |          |
| Employed              | .9343425 | .0892415  | -0.71 | 0.477 | .7748286             | 1.126696 |
|                       |          |           |       |       |                      |          |
| medcard               |          |           |       |       |                      |          |
| medcard/gp visit card | 1.425844 | .1318271  | 3.84  | 0.000 | 1.189525             | 1.709111 |
|                       |          |           |       |       |                      |          |
| Disability2           |          |           |       |       |                      |          |
| Disability            | 1.880549 | .1998814  | 5.94  | 0.000 | 1.526903             | 2.316103 |
| MHcesd_capi           | 1.021914 | .0050527  | 4.38  | 0.000 | 1.012059             | 1.031865 |
| _cons                 | .1416426 | .0518411  | -5.34 | 0.000 | .0691282             | .2902237 |
| -----+-----           |          |           |       |       |                      |          |
| /lnalpha              | 1.135652 | .078928   |       |       | .9809563             | 1.290348 |
| -----+-----           |          |           |       |       |                      |          |
| alpha                 | 3.113204 | .2457189  |       |       | 2.667005             | 3.634052 |
| -----+-----           |          |           |       |       |                      |          |

```
LR test of alpha=0: chibar2(01) = 644.50      Prob >= chibar2 = 0.000
```

**\*2b. Emergency visits - model including insurance\***

```
. nbreg emergency i.strokew1 zMoca i.ins2 age i.sex i.edu3 i.emp2 i.medcard i.Disability2
MHcesd_capi, irr nolog
```

```
Negative binomial regression      Number of obs   =      5,753
                                   LR chi2(11)      =      132.49
Dispersion = mean                 Prob > chi2     =      0.0000
Log likelihood = -3150.4197       Pseudo R2      =      0.0206
```

| emergency             | IRR      | Std. Err. | z     | P> z  | [95% Conf. Interval] |          |
|-----------------------|----------|-----------|-------|-------|----------------------|----------|
| -----+-----           |          |           |       |       |                      |          |
| strokew1              |          |           |       |       |                      |          |
| stroke                | 1.559522 | .4062789  | 1.71  | 0.088 | .9359244             | 2.598617 |
| zMoca                 | 1.049293 | .0453461  | 1.11  | 0.266 | .964076              | 1.142042 |
|                       |          |           |       |       |                      |          |
| ins2                  |          |           |       |       |                      |          |
| private insurance     | .8688459 | .0777711  | -1.57 | 0.116 | .7290395             | 1.035463 |
| age                   | 1.002204 | .00546    | 0.40  | 0.686 | .9915593             | 1.012962 |
|                       |          |           |       |       |                      |          |
| sex                   |          |           |       |       |                      |          |
| Female                | .9707361 | .0739303  | -0.39 | 0.697 | .8361313             | 1.12701  |
|                       |          |           |       |       |                      |          |
| edu3                  |          |           |       |       |                      |          |
| secondary edu         | 1.006462 | .0999081  | 0.06  | 0.948 | .828517              | 1.222625 |
| third level edu       | 1.19967  | .1353425  | 1.61  | 0.107 | .9616836             | 1.49655  |
|                       |          |           |       |       |                      |          |
| emp2                  |          |           |       |       |                      |          |
| Employed              | .9359685 | .0893195  | -0.69 | 0.488 | .7763027             | 1.128474 |
|                       |          |           |       |       |                      |          |
| medcard               |          |           |       |       |                      |          |
| medcard/gp visit card | 1.344173 | .1329223  | 2.99  | 0.003 | 1.107342             | 1.631656 |
|                       |          |           |       |       |                      |          |
| Disability2           |          |           |       |       |                      |          |
| Disability            | 1.846807 | .1966862  | 5.76  | 0.000 | 1.498884             | 2.275491 |
| MHcesd_capi           | 1.020814 | .0050905  | 4.13  | 0.000 | 1.010885             | 1.03084  |
| _cons                 | .1364452 | .0499853  | -5.44 | 0.000 | .0665471             | .279761  |
| -----+-----           |          |           |       |       |                      |          |
| /lnalpha              | 1.131686 | .079167   |       |       | .9765215             | 1.28685  |
| -----+-----           |          |           |       |       |                      |          |
| alpha                 | 3.10088  | .2454874  |       |       | 2.655204             | 3.621363 |
| -----+-----           |          |           |       |       |                      |          |

```
LR test of alpha=0: chibar2(01) = 635.78      Prob >= chibar2 = 0.000
```

**\*3a.Nights in hospital - original model\***

```
. nbreg nights i.strokew1 zMoca age i.sex i.edu3 i.emp2 i.medcard i.Disability2 MHcesd_capi, irr
nolog
```

```
Negative binomial regression      Number of obs   =      5,758
                                   LR chi2(10)      =      100.85
Dispersion      = mean           Prob > chi2     =      0.0000
Log likelihood = -4043.7539      Pseudo R2      =      0.0123
```

| nights                | IRR      | Std. Err. | z     | P> z  | [95% Conf. Interval] |          |
|-----------------------|----------|-----------|-------|-------|----------------------|----------|
| -----+-----           |          |           |       |       |                      |          |
| strokew1              |          |           |       |       |                      |          |
| stroke                | 1.930541 | .8994416  | 1.41  | 0.158 | .7746455             | 4.811217 |
| zMoca                 | 1.047743 | .0662378  | 0.74  | 0.461 | .92564               | 1.185952 |
| age                   | 1.021044 | .0088188  | 2.41  | 0.016 | 1.003905             | 1.038475 |
|                       |          |           |       |       |                      |          |
| sex                   |          |           |       |       |                      |          |
| Female                | .9332921 | .1110405  | -0.58 | 0.562 | .7391694             | 1.178396 |
|                       |          |           |       |       |                      |          |
| edu3                  |          |           |       |       |                      |          |
| secondary edu         | 1.233323 | .1891828  | 1.37  | 0.172 | .9130801             | 1.665885 |
| third level edu       | 1.251192 | .2208183  | 1.27  | 0.204 | .8853166             | 1.768274 |
|                       |          |           |       |       |                      |          |
| emp2                  |          |           |       |       |                      |          |
| Employed              | .7813591 | .1203808  | -1.60 | 0.109 | .5777096             | 1.056798 |
|                       |          |           |       |       |                      |          |
| medcard               |          |           |       |       |                      |          |
| medcard/gp visit card | 1.518647 | .2199657  | 2.88  | 0.004 | 1.143315             | 2.017193 |
|                       |          |           |       |       |                      |          |
| Disability2           |          |           |       |       |                      |          |
| Disability            | 2.106449 | .3963532  | 3.96  | 0.000 | 1.456758             | 3.045892 |
| MHcesd_capi           | 1.0189   | .0088877  | 2.15  | 0.032 | 1.001628             | 1.036469 |
| _cons                 | .0973825 | .0587259  | -3.86 | 0.000 | .0298655             | .3175357 |
| -----+-----           |          |           |       |       |                      |          |
| /lnalpha              | 2.852873 | .0487549  |       |       | 2.757315             | 2.948431 |
| -----+-----           |          |           |       |       |                      |          |
| alpha                 | 17.33752 | .8452886  |       |       | 15.75748             | 19.07599 |
| -----+-----           |          |           |       |       |                      |          |

```
LR test of alpha=0: chibar2(01) = 1.0e+04      Prob >= chibar2 = 0.000
```

**\*3b.Nights in hospital - model including insurance\***

```
. nbreg nights i.strokew1 zMoca i.ins2 age i.sex i.edu3 i.emp2 i.medcard i.Disability2
MHcesd_capi, irr nolog
```

```
Negative binomial regression      Number of obs   =      5,754
                                   LR chi2(11)      =      100.77
Dispersion = mean                 Prob > chi2     =      0.0000
Log likelihood = -4040.2153       Pseudo R2      =      0.0123
```

| nights                | IRR      | Std. Err. | z     | P> z  | [95% Conf. Interval] |          |
|-----------------------|----------|-----------|-------|-------|----------------------|----------|
| strokew1              |          |           |       |       |                      |          |
| stroke                | 1.92784  | .8988453  | 1.41  | 0.159 | .7730417             | 4.807721 |
| zMoca                 | 1.048222 | .0663228  | 0.74  | 0.457 | .9259687             | 1.186616 |
| ins2                  |          |           |       |       |                      |          |
| private insurance     | 1.070257 | .1617246  | 0.45  | 0.653 | .7959114             | 1.439169 |
| age                   | 1.020357 | .0089522  | 2.30  | 0.022 | 1.002961             | 1.038055 |
| sex                   |          |           |       |       |                      |          |
| Female                | .9286919 | .1109297  | -0.62 | 0.536 | .7348487             | 1.173668 |
| edu3                  |          |           |       |       |                      |          |
| secondary edu         | 1.209907 | .1927329  | 1.20  | 0.232 | .8854404             | 1.653274 |
| third level edu       | 1.221389 | .2252715  | 1.08  | 0.278 | .8508625             | 1.753269 |
| emp2                  |          |           |       |       |                      |          |
| Employed              | .7838596 | .1209826  | -1.58 | 0.115 | .5792445             | 1.060754 |
| medcard               |          |           |       |       |                      |          |
| medcard/gp visit card | 1.566816 | .2534868  | 2.78  | 0.006 | 1.141056             | 2.151441 |
| Disability2           |          |           |       |       |                      |          |
| Disability            | 2.116934 | .3993409  | 3.98  | 0.000 | 1.462634             | 3.063931 |
| MHcesd_capi           | 1.019098 | .0089096  | 2.16  | 0.030 | 1.001785             | 1.036711 |
| _cons                 | .0974991 | .0588243  | -3.86 | 0.000 | .0298843             | .3180956 |
| /lnalpha              | 2.854183 | .0487796  |       |       | 2.758577             | 2.949789 |
| alpha                 | 17.36025 | .8468264  |       |       | 15.77737             | 19.10193 |

```
LR test of alpha=0: chibar2(01) = 1.0e+04      Prob >= chibar2 = 0.000
```

**\*4a.Outpatient visits - original model\***

```
. nbreg outpatient i.strokew1 zMoca age i.sex i.edu3 i.emp2 i.medcard i.Disability2 MHcesd_capi,
irr nolog
```

```
Negative binomial regression      Number of obs   =      5,758
                                   LR chi2(10)      =      320.19
Dispersion = mean                 Prob > chi2     =      0.0000
Log likelihood = -8323.6887       Pseudo R2      =      0.0189
```

| outpatient            | IRR      | Std. Err. | z     | P> z  | [95% Conf. Interval] |          |
|-----------------------|----------|-----------|-------|-------|----------------------|----------|
| -----+-----           |          |           |       |       |                      |          |
| strokew1              |          |           |       |       |                      |          |
| stroke                | 1.491691 | .2666236  | 2.24  | 0.025 | 1.050838             | 2.117493 |
| zMoca                 | .9233992 | .0251754  | -2.92 | 0.003 | .8753515             | .9740841 |
| age                   | .9991229 | .0033752  | -0.26 | 0.795 | .9925296             | 1.00576  |
|                       |          |           |       |       |                      |          |
| sex                   |          |           |       |       |                      |          |
| Female                | .970144  | .0461093  | -0.64 | 0.524 | .883853              | 1.06486  |
|                       |          |           |       |       |                      |          |
| edu3                  |          |           |       |       |                      |          |
| secondary edu         | .9581131 | .0588409  | -0.70 | 0.486 | .8494575             | 1.080667 |
| third level edu       | 1.048307 | .072027   | 0.69  | 0.492 | .9162296             | 1.199424 |
|                       |          |           |       |       |                      |          |
| emp2                  |          |           |       |       |                      |          |
| Employed              | .6883726 | .0408307  | -6.30 | 0.000 | .6128225             | .7732367 |
|                       |          |           |       |       |                      |          |
| medcard               |          |           |       |       |                      |          |
| medcard/gp visit card | 1.308491 | .0735854  | 4.78  | 0.000 | 1.17193              | 1.460964 |
|                       |          |           |       |       |                      |          |
| Disability2           |          |           |       |       |                      |          |
| Disability            | 1.786977 | .12974    | 8.00  | 0.000 | 1.549955             | 2.060244 |
| MHcesd_capi           | 1.021031 | .0035114  | 6.05  | 0.000 | 1.014172             | 1.027936 |
| _cons                 | 1.027715 | .2380878  | 0.12  | 0.906 | .6526458             | 1.618334 |
| -----+-----           |          |           |       |       |                      |          |
| /lnalpha              | .7918733 | .0349612  |       |       | .7233506             | .860396  |
| -----+-----           |          |           |       |       |                      |          |
| alpha                 | 2.207528 | .0771779  |       |       | 2.061328             | 2.364097 |
| -----+-----           |          |           |       |       |                      |          |

```
LR test of alpha=0: chibar2(01) = 5125.52      Prob >= chibar2 = 0.000
```

**\*4b.Outpatient visits - model including insurance\***

```
. nbreg outpatient i.strokew1 zMoca i.ins2 age i.sex i.edu3 i.emp2 i.medcard i.Disability2
MHcesd_capi, irr nolog
```

```
Negative binomial regression      Number of obs   =      5,754
                                   LR chi2(11)      =      320.17
Dispersion      = mean           Prob > chi2     =      0.0000
Log likelihood = -8316.7611      Pseudo R2      =      0.0189
```

| outpatient            | IRR      | Std. Err. | z     | P> z  | [95% Conf. Interval] |          |
|-----------------------|----------|-----------|-------|-------|----------------------|----------|
| -----                 |          |           |       |       |                      |          |
| strokew1              |          |           |       |       |                      |          |
| stroke                | 1.490039 | .2664271  | 2.23  | 0.026 | 1.049538             | 2.115423 |
| zMoca                 | .9235939 | .0252291  | -2.91 | 0.004 | .8754462             | .9743896 |
|                       |          |           |       |       |                      |          |
| ins2                  |          |           |       |       |                      |          |
| private insurance     | 1.019028 | .0600746  | 0.32  | 0.749 | .9078318             | 1.143844 |
| age                   | .9988237 | .0034612  | -0.34 | 0.734 | .9920628             | 1.005631 |
|                       |          |           |       |       |                      |          |
| sex                   |          |           |       |       |                      |          |
| Female                | .9700035 | .046147   | -0.64 | 0.522 | .8836458             | 1.064801 |
|                       |          |           |       |       |                      |          |
| edu3                  |          |           |       |       |                      |          |
| secondary edu         | .9522039 | .0600993  | -0.78 | 0.438 | .8414058             | 1.077592 |
| third level edu       | 1.041242 | .0747811  | 0.56  | 0.574 | .9045215             | 1.198627 |
|                       |          |           |       |       |                      |          |
| emp2                  |          |           |       |       |                      |          |
| Employed              | .6871922 | .0407845  | -6.32 | 0.000 | .6117301             | .7719633 |
|                       |          |           |       |       |                      |          |
| medcard               |          |           |       |       |                      |          |
| medcard/gp visit card | 1.319573 | .0815822  | 4.49  | 0.000 | 1.168983             | 1.489562 |
|                       |          |           |       |       |                      |          |
| Disability2           |          |           |       |       |                      |          |
| Disability            | 1.790241 | .1302135  | 8.01  | 0.000 | 1.552384             | 2.064542 |
| MHcesd_capi           | 1.02106  | .0035179  | 6.05  | 0.000 | 1.014188             | 1.027978 |
| _cons                 | 1.036077 | .2404284  | 0.15  | 0.879 | .6574536             | 1.632747 |
| -----                 |          |           |       |       |                      |          |
| /lnalpha              | .7922529 | .0349706  |       |       | .7237118             | .8607939 |
| -----                 |          |           |       |       |                      |          |
| alpha                 | 2.208366 | .0772278  |       |       | 2.062073             | 2.365038 |
| -----                 |          |           |       |       |                      |          |

```
LR test of alpha=0: chibar2(01) = 5124.90      Prob >= chibar2 = 0.000
```

**\*5a.Rehab services used - 3 services (new variable: OT, Psychology and Physiotherapy)\***

```
. logit SSused3 i.strokew1 zMoca age i.sex i.edu3 i.emp2 i.medcard i.Disability2 MHcesd_capi, or
nolog
```

```
Logistic regression      Number of obs      =      5,760
                        LR chi2(10)                    =      260.77
                        Prob > chi2                    =      0.0000
Log likelihood = -1259.2078      Pseudo R2          =      0.0938
```

| SSused3               | Odds Ratio | Std. Err. | z     | P> z  | [95% Conf. Interval] |
|-----------------------|------------|-----------|-------|-------|----------------------|
| -----                 |            |           |       |       |                      |
| strokew1              |            |           |       |       |                      |
| stroke                | 1.247889   | .4231788  | 0.65  | 0.514 | .641978 2.42567      |
| zMoca                 | .9854331   | .0581176  | -0.25 | 0.804 | .8778617 1.106186    |
| age                   | .9876777   | .0072565  | -1.69 | 0.091 | .9735571 1.002003    |
|                       |            |           |       |       |                      |
| sex                   |            |           |       |       |                      |
| Female                | 1.139399   | .129593   | 1.15  | 0.251 | .9117204 1.423934    |
|                       |            |           |       |       |                      |
| edu3                  |            |           |       |       |                      |
| secondary edu         | 1.447394   | .2076175  | 2.58  | 0.010 | 1.092668 1.917278    |
| third level edu       | 1.763759   | .2863017  | 3.50  | 0.000 | 1.283122 2.424433    |
|                       |            |           |       |       |                      |
| emp2                  |            |           |       |       |                      |
| Employed              | .6002524   | .0949352  | -3.23 | 0.001 | .4402596 .8183875    |
|                       |            |           |       |       |                      |
| medcard               |            |           |       |       |                      |
| medcard/gp visit card | 2.697211   | .3800268  | 7.04  | 0.000 | 2.046369 3.555053    |
|                       |            |           |       |       |                      |
| Disability2           |            |           |       |       |                      |
| Disability            | 2.593357   | .3499073  | 7.06  | 0.000 | 1.990739 3.378394    |
| MHcesd_capi           | 1.039322   | .0066217  | 6.05  | 0.000 | 1.026425 1.052382    |
| _cons                 | .0424572   | .0217686  | -6.16 | 0.000 | .0155426 .1159789    |



**\*5b. Rehab services used (3 services) - model including insurance\***

. logit SSused3 i.strokew1 zMoca i.ins2 age i.sex i.edu3 i.emp2 i.medcard i.Disability2  
MHcesd\_capi, or nolog

|                             |               |   |        |
|-----------------------------|---------------|---|--------|
| Logistic regression         | Number of obs | = | 5,756  |
|                             | LR chi2(11)   | = | 256.37 |
|                             | Prob > chi2   | = | 0.0000 |
| Log likelihood = -1258.4763 | Pseudo R2     | = | 0.0924 |

| SSused3               | Odds Ratio | Std. Err. | z     | P> z  | [95% Conf. Interval] |
|-----------------------|------------|-----------|-------|-------|----------------------|
| -----                 |            |           |       |       |                      |
| strokew1              |            |           |       |       |                      |
| stroke                | 1.255797   | .4256175  | 0.67  | 0.502 | .6462916 2.440117    |
| zMoca                 | .9838256   | .0582233  | -0.28 | 0.783 | .8760797 1.104823    |
|                       |            |           |       |       |                      |
| ins2                  |            |           |       |       |                      |
| private insurance     | .9642815   | .1269263  | -0.28 | 0.782 | .7450098 1.248089    |
| age                   | .9883855   | .0075732  | -1.52 | 0.127 | .9736531 1.003341    |
|                       |            |           |       |       |                      |
| sex                   |            |           |       |       |                      |
| Female                | 1.138567   | .1295439  | 1.14  | 0.254 | .9109836 1.423006    |
|                       |            |           |       |       |                      |
| edu3                  |            |           |       |       |                      |
| secondary edu         | 1.451313   | .2120397  | 2.55  | 0.011 | 1.089931 1.932517    |
| third level edu       | 1.779988   | .2984687  | 3.44  | 0.001 | 1.281408 2.472559    |
|                       |            |           |       |       |                      |
| emp2                  |            |           |       |       |                      |
| Employed              | .6015445   | .0951988  | -3.21 | 0.001 | .4411222 .8203074    |
|                       |            |           |       |       |                      |
| medcard               |            |           |       |       |                      |
| medcard/gp visit card | 2.651081   | .401044   | 6.44  | 0.000 | 1.970866 3.566064    |
|                       |            |           |       |       |                      |
| Disability2           |            |           |       |       |                      |
| Disability            | 2.57538    | .3492746  | 6.98  | 0.000 | 1.974244 3.359555    |
| MHcesd_capi           | 1.038788   | .0066504  | 5.94  | 0.000 | 1.025835 1.051905    |
| _cons                 | .0418651   | .0215945  | -6.15 | 0.000 | .0152333 .1150564    |

**\*6a.Rehab services used - 2 services only (original variable: OT and Psychology) \***

. logit RehabUsed2 i.strokew1 zMoca age i.sex i.edu3 i.emp2 i.medcard i.Disability2 MHcesd\_capi,  
or nolog

```

Logistic regression                Number of obs    =      5,760
                                   LR chi2(10)       =      160.85
                                   Prob > chi2        =      0.0000
Log likelihood = -533.39536        Pseudo R2       =      0.1310
  
```

| RehabUsed2            | Odds Ratio | Std. Err. | z     | P> z  | [95% Conf. Interval] |
|-----------------------|------------|-----------|-------|-------|----------------------|
| -----                 |            |           |       |       |                      |
| strokew1              |            |           |       |       |                      |
| stroke                | 3.023982   | 1.210921  | 2.76  | 0.006 | 1.37951 6.628779     |
| zMoca                 | .9380939   | .0918678  | -0.65 | 0.514 | .7742619 1.136592    |
| age                   | .9660501   | .0117159  | -2.85 | 0.004 | .9433582 .9892879    |
| sex                   |            |           |       |       |                      |
| Female                | .98947     | .1873641  | -0.06 | 0.955 | .6826857 1.434117    |
| edu3                  |            |           |       |       |                      |
| secondary edu         | 1.573118   | .3827416  | 1.86  | 0.063 | .9764793 2.53431     |
| third level edu       | 2.043387   | .5582288  | 2.62  | 0.009 | 1.196224 3.490509    |
| emp2                  |            |           |       |       |                      |
| Employed              | .4544699   | .1282731  | -2.79 | 0.005 | .2613698 .7902326    |
| medcard               |            |           |       |       |                      |
| medcard/gp visit card | 2.865971   | .6841755  | 4.41  | 0.000 | 1.795022 4.575872    |
| Disability2           |            |           |       |       |                      |
| Disability            | 3.386041   | .7127287  | 5.79  | 0.000 | 2.241416 5.115191    |
| MHcesd_capi           | 1.048094   | .0098247  | 5.01  | 0.000 | 1.029013 1.067528    |
| _cons                 | .0442429   | .0373463  | -3.69 | 0.000 | .0084591 .2313985    |
| -----                 |            |           |       |       |                      |

**\*6b. Rehab services used (2 services) - model including insurance\***

. logit RehabUsed2 i.strokew1 zMoca i.ins2 age i.sex i.edu3 i.emp2 i.medcard i.Disability2  
MHcesd\_capi, or nolog

```

Logistic regression      Number of obs      =      5,756
                        LR chi2(11)      =      155.13
                        Prob > chi2     =      0.0000
Log likelihood = -532.37525  Pseudo R2         =      0.1272
    
```

| RehabUsed2            | Odds Ratio | Std. Err. | z     | P> z  | [95% Conf. Interval] |
|-----------------------|------------|-----------|-------|-------|----------------------|
| -----                 |            |           |       |       |                      |
| strokew1              |            |           |       |       |                      |
| stroke                | 3.065494   | 1.226442  | 2.80  | 0.005 | 1.399433 6.715045    |
| zMoca                 | .9359527   | .0920593  | -0.67 | 0.501 | .771846 1.134951     |
|                       |            |           |       |       |                      |
| ins2                  |            |           |       |       |                      |
| private insurance     | .9612339   | .2131456  | -0.18 | 0.858 | .6224182 1.484485    |
| age                   | .9669326   | .0123155  | -2.64 | 0.008 | .9430935 .9913744    |
|                       |            |           |       |       |                      |
| sex                   |            |           |       |       |                      |
| Female                | .9854501   | .1869269  | -0.08 | 0.938 | .6794741 1.429211    |
|                       |            |           |       |       |                      |
| edu3                  |            |           |       |       |                      |
| secondary edu         | 1.558739   | .3853763  | 1.80  | 0.073 | .9601209 2.530586    |
| third level edu       | 2.051816   | .5775512  | 2.55  | 0.011 | 1.181788 3.562354    |
|                       |            |           |       |       |                      |
| emp2                  |            |           |       |       |                      |
| Employed              | .4557496   | .1288219  | -2.78 | 0.005 | .2618945 .7930971    |
|                       |            |           |       |       |                      |
| medcard               |            |           |       |       |                      |
| medcard/gp visit card | 2.804016   | .7223069  | 4.00  | 0.000 | 1.69244 4.645662     |
|                       |            |           |       |       |                      |
| Disability2           |            |           |       |       |                      |
| Disability            | 3.346762   | .7095832  | 5.70  | 0.000 | 2.20878 5.071043     |
| MHcesd_capi           | 1.046822   | .0099186  | 4.83  | 0.000 | 1.027561 1.066444    |
| _cons                 | .0439556   | .0374328  | -3.67 | 0.000 | .0082819 .2332924    |
| -----                 |            |           |       |       |                      |

\*\*\*\*\*

**3. Multiple regressions including cover (0=no cover;1=medical card or GP card only/ 2=private insurance only/ 3=dual cover) as a covariate instead of medcard**

. tab cover

| cover             | Freq. | Percent | Cum.   |
|-------------------|-------|---------|--------|
| No cover          | 842   | 10.32   | 10.32  |
| Medical card only | 2,621 | 32.11   | 42.43  |
| Insurance only    | 3,281 | 40.20   | 82.63  |
| Dual cover        | 1,418 | 17.37   | 100.00 |
| Total             | 8,162 | 100.00  |        |

**\*1a.GP visits - original model\***

. nbreg gpvisits i.strokew1 zMoca age i.sex i.edu3 i.emp2 i.medcard i.Disability2 MHcesd\_capi, irr nolog

```
Negative binomial regression          Number of obs   =    5,753
                                      LR chi2(10)      =   1364.13
Dispersion = mean                    Prob > chi2      =    0.0000
Log likelihood = -13146.315          Pseudo R2       =    0.0493
```

| gpvisits              | IRR      | Std. Err. | z     | P> z  | [95% Conf. Interval] |
|-----------------------|----------|-----------|-------|-------|----------------------|
| strokew1              |          |           |       |       |                      |
| stroke                | 1.26931  | .1088749  | 2.78  | 0.005 | 1.072892 1.501687    |
| zMoca                 | 1.066888 | .0136849  | 5.05  | 0.000 | 1.040401 1.09405     |
| age                   | 1.003391 | .0016149  | 2.10  | 0.035 | 1.000231 1.006561    |
| sex                   |          |           |       |       |                      |
| Female                | 1.016083 | .0235785  | 0.69  | 0.492 | .9709047 1.063363    |
| edu3                  |          |           |       |       |                      |
| secondary edu         | .9953264 | .0292704  | -0.16 | 0.873 | .9395795 1.054381    |
| third level edu       | .9537152 | .0318513  | -1.42 | 0.156 | .8932871 1.018231    |
| emp2                  |          |           |       |       |                      |
| Employed              | .8489824 | .0245915  | -5.65 | 0.000 | .8021266 .8985752    |
| medcard               |          |           |       |       |                      |
| medcard/gp visit card | 1.597204 | .0444586  | 16.82 | 0.000 | 1.512401 1.686762    |
| Disability2           |          |           |       |       |                      |

|                                           |  |           |          |                         |       |           |           |
|-------------------------------------------|--|-----------|----------|-------------------------|-------|-----------|-----------|
| Disability                                |  | 1.434818  | .050219  | 10.32                   | 0.000 | 1.339691  | 1.5367    |
| MHcesd_capi                               |  | 1.018779  | .0016563 | 11.44                   | 0.000 | 1.015538  | 1.02203   |
| _cons                                     |  | 2.029435  | .225706  | 6.36                    | 0.000 | 1.631953  | 2.523728  |
| -----+-----                               |  |           |          |                         |       |           |           |
| /lnalpha                                  |  | -.8281074 | .0318193 |                         |       | -.8904721 | -.7657428 |
| -----+-----                               |  |           |          |                         |       |           |           |
| alpha                                     |  | .4368753  | .0139011 |                         |       | .4104619  | .4649884  |
| -----                                     |  |           |          |                         |       |           |           |
| LR test of alpha=0: chibar2(01) = 4075.71 |  |           |          | Prob >= chibar2 = 0.000 |       |           |           |

**\*1b.GP visits - model including cover instead of medical card\***

```
. nbreg gpvisits i.strokew1 zMoca age i.sex i.edu3 i.emp2 i.cover i.Disability2 MHcesd_capi, irr
nolog
```

```
Negative binomial regression      Number of obs   =      5,749
                                LR chi2(12)      =     1371.17
Dispersion      = mean           Prob > chi2     =      0.0000
Log likelihood = -13128.512      Pseudo R2      =      0.0496
```

| gpvisits          | IRR       | Std. Err. | z     | P> z  | [95% Conf. Interval] |           |
|-------------------|-----------|-----------|-------|-------|----------------------|-----------|
| strokew1          |           |           |       |       |                      |           |
| stroke            | 1.264975  | .108289   | 2.75  | 0.006 | 1.069582             | 1.496062  |
| zMoca             | 1.065209  | .0137042  | 4.91  | 0.000 | 1.038685             | 1.09241   |
| age               | 1.004104  | .0016661  | 2.47  | 0.014 | 1.000844             | 1.007375  |
| sex               |           |           |       |       |                      |           |
| Female            | 1.013742  | .0235072  | 0.59  | 0.556 | .9686999             | 1.060878  |
| edu3              |           |           |       |       |                      |           |
| secondary edu     | 1.003761  | .0301187  | 0.13  | 0.900 | .9464321             | 1.064563  |
| third level edu   | .9558508  | .0327583  | -1.32 | 0.188 | .8937547             | 1.022261  |
| emp2              |           |           |       |       |                      |           |
| Employed          | .8546409  | .0247762  | -5.42 | 0.000 | .8074344             | .9046074  |
| cover             |           |           |       |       |                      |           |
| Medical card only | 1.85272   | .0863508  | 13.23 | 0.000 | 1.690976             | 2.029936  |
| Insurance only    | 1.148018  | .0497806  | 3.18  | 0.001 | 1.05448              | 1.249852  |
| Dual cover        | 1.692786  | .0849942  | 10.48 | 0.000 | 1.534135             | 1.867844  |
| Disability2       |           |           |       |       |                      |           |
| Disability        | 1.428096  | .0499838  | 10.18 | 0.000 | 1.333415             | 1.529501  |
| MHcesd_capi       | 1.018661  | .0016601  | 11.34 | 0.000 | 1.015412             | 1.02192   |
| _cons             | 1.725882  | .2030493  | 4.64  | 0.000 | 1.370464             | 2.173474  |
| /lnalpha          | -.8331272 | .031896   |       |       | -.8956423            | -.7706122 |
| alpha             | .4346878  | .0138648  |       |       | .4083452             | .4627297  |

```
LR test of alpha=0: chibar2(01) = 4045.44      Prob >= chibar2 = 0.000
```

**\*2a. Emergency visits - original model\***

```
. nbreg emergency i.strokew1 zMoca age i.sex i.edu3 i.emp2 i.medcard i.Disability2 MHcesd_capi,
irr nolog
```

```
Negative binomial regression      Number of obs   =      5,757
                                   LR chi2(10)      =      136.19
Dispersion = mean                 Prob > chi2     =      0.0000
Log likelihood = -3156.5347       Pseudo R2      =      0.0211
```

| emergency             | IRR      | Std. Err. | z     | P> z  | [95% Conf. Interval] |          |
|-----------------------|----------|-----------|-------|-------|----------------------|----------|
| -----+-----           |          |           |       |       |                      |          |
| strokew1              |          |           |       |       |                      |          |
| stroke                | 1.562992 | .4085484  | 1.71  | 0.088 | .936402              | 2.608863 |
| zMoca                 | 1.055994 | .0455497  | 1.26  | 0.207 | .9703874             | 1.149152 |
| age                   | 1.000074 | .0053157  | 0.01  | 0.989 | .9897096             | 1.010547 |
|                       |          |           |       |       |                      |          |
| sex                   |          |           |       |       |                      |          |
| Female                | .9694865 | .0738441  | -0.41 | 0.684 | .83504               | 1.12558  |
|                       |          |           |       |       |                      |          |
| edu3                  |          |           |       |       |                      |          |
| secondary edu         | .981302  | .0952215  | -0.19 | 0.846 | .811345              | 1.186861 |
| third level edu       | 1.150641 | .1256091  | 1.29  | 0.199 | .9290065             | 1.42515  |
|                       |          |           |       |       |                      |          |
| emp2                  |          |           |       |       |                      |          |
| Employed              | .9343425 | .0892415  | -0.71 | 0.477 | .7748286             | 1.126696 |
|                       |          |           |       |       |                      |          |
| medcard               |          |           |       |       |                      |          |
| medcard/gp visit card | 1.425844 | .1318271  | 3.84  | 0.000 | 1.189525             | 1.709111 |
|                       |          |           |       |       |                      |          |
| Disability2           |          |           |       |       |                      |          |
| Disability            | 1.880549 | .1998814  | 5.94  | 0.000 | 1.526903             | 2.316103 |
| MHcesd_capi           | 1.021914 | .0050527  | 4.38  | 0.000 | 1.012059             | 1.031865 |
| _cons                 | .1416426 | .0518411  | -5.34 | 0.000 | .0691282             | .2902237 |
| -----+-----           |          |           |       |       |                      |          |
| /lnalpha              | 1.135652 | .078928   |       |       | .9809563             | 1.290348 |
| -----+-----           |          |           |       |       |                      |          |
| alpha                 | 3.113204 | .2457189  |       |       | 2.667005             | 3.634052 |
| -----+-----           |          |           |       |       |                      |          |

```
LR test of alpha=0: chibar2(01) = 644.50      Prob >= chibar2 = 0.000
```

**\*2b. Emergency visits - model including cover instead of medical card\***

```
. nbreg emergency i.strokew1 zMoca age i.sex i.edu3 i.emp2 i.cover i.Disability2 MHcesd_capi, irr
nolog
```

```
Negative binomial regression      Number of obs   =      5,753
                                   LR chi2(12)      =      133.02
Dispersion      = mean           Prob > chi2     =      0.0000
Log likelihood = -3150.155       Pseudo R2      =      0.0207
```

| emergency         | IRR      | Std. Err. | z     | P> z  | [95% Conf. Interval] |          |
|-------------------|----------|-----------|-------|-------|----------------------|----------|
| strokew1          |          |           |       |       |                      |          |
| stroke            | 1.565694 | .4081133  | 1.72  | 0.085 | .9393622             | 2.609642 |
| zMoca             | 1.050141 | .0453807  | 1.13  | 0.258 | .9648586             | 1.14296  |
| age               | 1.001894 | .0054743  | 0.35  | 0.729 | .9912222             | 1.012682 |
| sex               |          |           |       |       |                      |          |
| Female            | .9726593 | .0741259  | -0.36 | 0.716 | .837705              | 1.129355 |
| edu3              |          |           |       |       |                      |          |
| secondary edu     | 1.000985 | .099586   | 0.01  | 0.992 | .8236506             | 1.216499 |
| third level edu   | 1.198483 | .1351645  | 1.61  | 0.108 | .9608019             | 1.494962 |
| emp2              |          |           |       |       |                      |          |
| Employed          | .9324084 | .089132   | -0.73 | 0.464 | .7731024             | 1.124541 |
| cover             |          |           |       |       |                      |          |
| Medical card only | 1.241408 | .182592   | 1.47  | 0.142 | .930499              | 1.656201 |
| Insurance only    | .8060051 | .109816   | -1.58 | 0.113 | .6171119             | 1.052717 |
| Dual cover        | 1.133766 | .1812589  | 0.79  | 0.432 | .8287793             | 1.550985 |
| Disability2       |          |           |       |       |                      |          |
| Disability        | 1.84943  | .1969827  | 5.77  | 0.000 | 1.500985             | 2.278764 |
| MHcesd_capi       | 1.020777 | .0050898  | 4.12  | 0.000 | 1.010849             | 1.030801 |
| _cons             | .1481228 | .0567526  | -4.98 | 0.000 | .0699018             | .3138744 |
| /lnalpha          | 1.131259 | .0791762  |       |       | .9760763             | 1.286442 |
| alpha             | 3.099556 | .2454112  |       |       | 2.654022             | 3.619882 |

```
LR test of alpha=0: chibar2(01) = 635.39      Prob >= chibar2 = 0.000
```



**\*3a.Nights in hospital - original model\***

```
. nbreg nights i.strokew1 zMoca age i.sex i.edu3 i.emp2 i.medcard i.Disability2 MHcesd_capi, irr
nolog
```

```
Negative binomial regression      Number of obs   =      5,758
                                   LR chi2(10)      =      100.85
Dispersion      = mean            Prob > chi2     =      0.0000
Log likelihood = -4043.7539       Pseudo R2      =      0.0123
```

| nights                | IRR      | Std. Err. | z     | P> z  | [95% Conf. Interval] |          |
|-----------------------|----------|-----------|-------|-------|----------------------|----------|
| strokew1              |          |           |       |       |                      |          |
| stroke                | 1.930541 | .8994416  | 1.41  | 0.158 | .7746455             | 4.811217 |
| zMoca                 | 1.047743 | .0662378  | 0.74  | 0.461 | .92564               | 1.185952 |
| age                   | 1.021044 | .0088188  | 2.41  | 0.016 | 1.003905             | 1.038475 |
| sex                   |          |           |       |       |                      |          |
| Female                | .9332921 | .1110405  | -0.58 | 0.562 | .7391694             | 1.178396 |
| edu3                  |          |           |       |       |                      |          |
| secondary edu         | 1.233323 | .1891828  | 1.37  | 0.172 | .9130801             | 1.665885 |
| third level edu       | 1.251192 | .2208183  | 1.27  | 0.204 | .8853166             | 1.768274 |
| emp2                  |          |           |       |       |                      |          |
| Employed              | .7813591 | .1203808  | -1.60 | 0.109 | .5777096             | 1.056798 |
| medcard               |          |           |       |       |                      |          |
| medcard/gp visit card | 1.518647 | .2199657  | 2.88  | 0.004 | 1.143315             | 2.017193 |
| Disability2           |          |           |       |       |                      |          |
| Disability            | 2.106449 | .3963532  | 3.96  | 0.000 | 1.456758             | 3.045892 |
| MHcesd_capi           | 1.0189   | .0088877  | 2.15  | 0.032 | 1.001628             | 1.036469 |
| _cons                 | .0973825 | .0587259  | -3.86 | 0.000 | .0298655             | .3175357 |
| /lnalpha              | 2.852873 | .0487549  |       |       | 2.757315             | 2.948431 |
| alpha                 | 17.33752 | .8452886  |       |       | 15.75748             | 19.07599 |

```
LR test of alpha=0: chibar2(01) = 1.0e+04      Prob >= chibar2 = 0.000
```

**\*3b.Nights in hospital - model including cover instead of medical card\***

```
. nbreg nights i.strokew1 zMoca age i.sex i.edu3 i.emp2 i.cover i.Disability2 MHcesd_capi, irr
nolog
```

```
Negative binomial regression      Number of obs   =      5,754
                                   LR chi2(12)      =      105.42
Dispersion   = mean              Prob > chi2     =      0.0000
Log likelihood = -4037.8908      Pseudo R2      =      0.0129
```

| nights            | IRR      | Std. Err. | z     | P> z  | [95% Conf. Interval] |          |
|-------------------|----------|-----------|-------|-------|----------------------|----------|
| strokew1          |          |           |       |       |                      |          |
| stroke            | 1.892449 | .8805335  | 1.37  | 0.170 | .7602742             | 4.710618 |
| zMoca             | 1.042986 | .0660888  | 0.66  | 0.507 | .9211749             | 1.180905 |
| age               | 1.021487 | .0089723  | 2.42  | 0.016 | 1.004053             | 1.039225 |
| sex               |          |           |       |       |                      |          |
| Female            | .9059521 | .1088196  | -0.82 | 0.411 | .715916              | 1.146432 |
| edu3              |          |           |       |       |                      |          |
| secondary edu     | 1.220133 | .1933312  | 1.26  | 0.209 | .8944033             | 1.664489 |
| third level edu   | 1.222751 | .2235265  | 1.10  | 0.271 | .8545412             | 1.749617 |
| emp2              |          |           |       |       |                      |          |
| Employed          | .8079196 | .1252901  | -1.38 | 0.169 | .5961643             | 1.09489  |
| cover             |          |           |       |       |                      |          |
| Medical card only | 2.359292 | .5711878  | 3.55  | 0.000 | 1.467927             | 3.791916 |
| Insurance only    | 1.544237 | .3373096  | 1.99  | 0.047 | 1.006433             | 2.369425 |
| Dual cover        | 1.99021  | .5185509  | 2.64  | 0.008 | 1.194312             | 3.316502 |
| Disability2       |          |           |       |       |                      |          |
| Disability        | 2.13453  | .402248   | 4.02  | 0.000 | 1.47535              | 3.088229 |
| MHcesd_capi       | 1.019101 | .0089224  | 2.16  | 0.031 | 1.001763             | 1.03674  |
| _cons             | .0663251 | .0413687  | -4.35 | 0.000 | .0195327             | .2252133 |
| /lnalpha          | 2.849256 | .0488281  |       |       | 2.753554             | 2.944957 |
| alpha             | 17.27492 | .8435024  |       |       | 15.69833             | 19.00985 |

```
LR test of alpha=0: chibar2(01) = 1.0e+04      Prob >= chibar2 = 0.000
```

**\*4a.Outpatient visits - original model\***

```
. nbreg outpatient i.strokew1 zMoca age i.sex i.edu3 i.emp2 i.medcard i.Disability2 MHcesd_capi,
irr nolog
```

```
Negative binomial regression      Number of obs   =      5,758
                                   LR chi2(10)      =      320.19
Dispersion      = mean           Prob > chi2     =      0.0000
Log likelihood = -8323.6887      Pseudo R2      =      0.0189
```

| outpatient            | IRR      | Std. Err. | z     | P> z  | [95% Conf. Interval] |          |
|-----------------------|----------|-----------|-------|-------|----------------------|----------|
| -----                 |          |           |       |       |                      |          |
| strokew1              |          |           |       |       |                      |          |
| stroke                | 1.491691 | .2666236  | 2.24  | 0.025 | 1.050838             | 2.117493 |
| zMoca                 | .9233992 | .0251754  | -2.92 | 0.003 | .8753515             | .9740841 |
| age                   | .9991229 | .0033752  | -0.26 | 0.795 | .9925296             | 1.00576  |
| sex                   |          |           |       |       |                      |          |
| Female                | .970144  | .0461093  | -0.64 | 0.524 | .883853              | 1.06486  |
| edu3                  |          |           |       |       |                      |          |
| secondary edu         | .9581131 | .0588409  | -0.70 | 0.486 | .8494575             | 1.080667 |
| third level edu       | 1.048307 | .072027   | 0.69  | 0.492 | .9162296             | 1.199424 |
| emp2                  |          |           |       |       |                      |          |
| Employed              | .6883726 | .0408307  | -6.30 | 0.000 | .6128225             | .7732367 |
| medcard               |          |           |       |       |                      |          |
| medcard/gp visit card | 1.308491 | .0735854  | 4.78  | 0.000 | 1.17193              | 1.460964 |
| Disability2           |          |           |       |       |                      |          |
| Disability            | 1.786977 | .12974    | 8.00  | 0.000 | 1.549955             | 2.060244 |
| MHcesd_capi           | 1.021031 | .0035114  | 6.05  | 0.000 | 1.014172             | 1.027936 |
| _cons                 | 1.027715 | .2380878  | 0.12  | 0.906 | .6526458             | 1.618334 |
| -----                 |          |           |       |       |                      |          |
| /lnalpha              | .7918733 | .0349612  |       |       | .7233506             | .860396  |
| -----                 |          |           |       |       |                      |          |
| alpha                 | 2.207528 | .0771779  |       |       | 2.061328             | 2.364097 |
| -----                 |          |           |       |       |                      |          |

```
LR test of alpha=0: chibar2(01) = 5125.52      Prob >= chibar2 = 0.000
```

**\*4b.Outpatient visits - model including cover instead of medical card\***

```
. nbreg outpatient i.strokew1 zMoca age i.sex i.edu3 i.emp2 i.cover i.Disability2 MHcesd_capi,
irr nolog
```

```
Negative binomial regression      Number of obs   =      5,754
                                LR chi2(12)      =      328.39
Dispersion = mean                Prob > chi2     =      0.0000
Log likelihood = -8312.6511      Pseudo R2      =      0.0194
```

| outpatient        | IRR      | Std. Err. | z     | P> z  | [95% Conf. Interval] |          |
|-------------------|----------|-----------|-------|-------|----------------------|----------|
| -----+-----       |          |           |       |       |                      |          |
| strokew1          |          |           |       |       |                      |          |
| stroke            | 1.486677 | .2653898  | 2.22  | 0.026 | 1.047772             | 2.109436 |
| zMoca             | .9232165 | .0252165  | -2.92 | 0.003 | .8750928             | .9739866 |
| age               | .999673  | .0034779  | -0.09 | 0.925 | .9928795             | 1.006513 |
|                   |          |           |       |       |                      |          |
| sex               |          |           |       |       |                      |          |
| Female            | .9633728 | .0458543  | -0.78 | 0.433 | .8775647             | 1.057571 |
|                   |          |           |       |       |                      |          |
| edu3              |          |           |       |       |                      |          |
| secondary edu     | .962892  | .0608211  | -0.60 | 0.549 | .8507685             | 1.089792 |
| third level edu   | 1.043898 | .0748138  | 0.60  | 0.549 | .9070987             | 1.201329 |
|                   |          |           |       |       |                      |          |
| emp2              |          |           |       |       |                      |          |
| Employed          | .6971448 | .0414856  | -6.06 | 0.000 | .6203972             | .7833867 |
|                   |          |           |       |       |                      |          |
| cover             |          |           |       |       |                      |          |
| Medical card only | 1.629241 | .1552309  | 5.12  | 0.000 | 1.351713             | 1.96375  |
| Insurance only    | 1.234193 | .1088806  | 2.39  | 0.017 | 1.038222             | 1.467156 |
| Dual cover        | 1.460638 | .1515774  | 3.65  | 0.000 | 1.191816             | 1.790094 |
|                   |          |           |       |       |                      |          |
| Disability2       |          |           |       |       |                      |          |
| Disability        | 1.791215 | .1301236  | 8.02  | 0.000 | 1.553502             | 2.065302 |
| MHcesd_capi       | 1.020873 | .0035149  | 6.00  | 0.000 | 1.014007             | 1.027785 |
| _cons             | .8320982 | .2029429  | -0.75 | 0.451 | .5159083             | 1.342075 |
| -----+-----       |          |           |       |       |                      |          |
| /lnalpha          | .7884059 | .0350221  |       |       | .7197639             | .8570479 |
| -----+-----       |          |           |       |       |                      |          |
| alpha             | 2.199887 | .0770446  |       |       | 2.053948             | 2.356195 |
| -----+-----       |          |           |       |       |                      |          |

```
LR test of alpha=0: chibar2(01) = 5101.29      Prob >= chibar2 = 0.000
```

**\*5a.Rehab services used - 3 services (new variable: OT, Psychology and Physiotherapy)\***

. logit SSused3 i.strokew1 zMoca age i.sex i.edu3 i.emp2 i.medcard i.Disability2 MHcesd\_capi, or nolog

```

Logistic regression          Number of obs    =      5,760
                             LR chi2(10)           =      260.77
                             Prob > chi2            =      0.0000
Log likelihood = -1259.2078  Pseudo R2        =      0.0938
  
```

| SSused3               | Odds Ratio | Std. Err. | z     | P> z  | [95% Conf. Interval] |
|-----------------------|------------|-----------|-------|-------|----------------------|
| -----                 |            |           |       |       |                      |
| strokew1              |            |           |       |       |                      |
| stroke                | 1.247889   | .4231788  | 0.65  | 0.514 | .641978 2.42567      |
| zMoca                 | .9854331   | .0581176  | -0.25 | 0.804 | .8778617 1.106186    |
| age                   | .9876777   | .0072565  | -1.69 | 0.091 | .9735571 1.002003    |
|                       |            |           |       |       |                      |
| sex                   |            |           |       |       |                      |
| Female                | 1.139399   | .129593   | 1.15  | 0.251 | .9117204 1.423934    |
|                       |            |           |       |       |                      |
| edu3                  |            |           |       |       |                      |
| secondary edu         | 1.447394   | .2076175  | 2.58  | 0.010 | 1.092668 1.917278    |
| third level edu       | 1.763759   | .2863017  | 3.50  | 0.000 | 1.283122 2.424433    |
|                       |            |           |       |       |                      |
| emp2                  |            |           |       |       |                      |
| Employed              | .6002524   | .0949352  | -3.23 | 0.001 | .4402596 .8183875    |
|                       |            |           |       |       |                      |
| medcard               |            |           |       |       |                      |
| medcard/gp visit card | 2.697211   | .3800268  | 7.04  | 0.000 | 2.046369 3.555053    |
|                       |            |           |       |       |                      |
| Disability2           |            |           |       |       |                      |
| Disability            | 2.593357   | .3499073  | 7.06  | 0.000 | 1.990739 3.378394    |
| MHcesd_capi           | 1.039322   | .0066217  | 6.05  | 0.000 | 1.026425 1.052382    |
| _cons                 | .0424572   | .0217686  | -6.16 | 0.000 | .0155426 .1159789    |
| -----                 |            |           |       |       |                      |

**\*5b. Rehab services used (3 services) - model including cover instead of medical card\***

```
. logit SSused3 i.strokew1 zMoca age i.sex i.edu3 i.emp2 i.cover i.Disability2 MHcesd_capi, or
nolog
```

```
Logistic regression          Number of obs      =      5,756
                             LR chi2(12)            =      256.55
                             Prob > chi2             =      0.0000
Log likelihood = -1258.3851   Pseudo R2          =      0.0925
```

| SSused3           | Odds Ratio | Std. Err. | z     | P> z  | [95% Conf. Interval] |  |
|-------------------|------------|-----------|-------|-------|----------------------|--|
| -----             |            |           |       |       |                      |  |
| strokew1          |            |           |       |       |                      |  |
| stroke            | 1.256403   | .4257708  | 0.67  | 0.501 | .6466561 2.441096    |  |
| zMoca             | .9833193   | .0581988  | -0.28 | 0.776 | .8756193 1.104266    |  |
| age               | .9886388   | .0075956  | -1.49 | 0.137 | .9738632 1.003639    |  |
|                   |            |           |       |       |                      |  |
| sex               |            |           |       |       |                      |  |
| Female            | 1.137502   | .129451   | 1.13  | 0.258 | .9100875 1.421744    |  |
|                   |            |           |       |       |                      |  |
| edu3              |            |           |       |       |                      |  |
| secondary edu     | 1.456617   | .2133298  | 2.57  | 0.010 | 1.093155 1.940924    |  |
| third level edu   | 1.781957   | .2991283  | 3.44  | 0.001 | 1.28236 2.476191     |  |
|                   |            |           |       |       |                      |  |
| emp2              |            |           |       |       |                      |  |
| Employed          | .6031985   | .0955378  | -3.19 | 0.001 | .4422241 .8227693    |  |
|                   |            |           |       |       |                      |  |
| cover             |            |           |       |       |                      |  |
| Medical card only | 2.899676   | .7599295  | 4.06  | 0.000 | 1.734889 4.846489    |  |
| Insurance only    | 1.061058   | .2789838  | 0.23  | 0.822 | .6337714 1.776419    |  |
| Dual cover        | 2.715398   | .7542479  | 3.60  | 0.000 | 1.575425 4.680251    |  |
|                   |            |           |       |       |                      |  |
| Disability2       |            |           |       |       |                      |  |
| Disability        | 2.572788   | .3490275  | 6.97  | 0.000 | 1.9721 3.356441      |  |
| MHcesd_capi       | 1.038826   | .0066516  | 5.95  | 0.000 | 1.025871 1.051945    |  |
| _cons             | .0380032   | .0214693  | -5.79 | 0.000 | .0125588 .1149985    |  |
| -----             |            |           |       |       |                      |  |

**\*6a.Rehab services used- 2 services only (original variable: OT and Psychology) \***

. logit RehabUsed2 i.strokew1 zMoca age i.sex i.edu3 i.emp2 i.medcard i.Disability2 MHcesd\_capi,  
or nolog

```

Logistic regression                Number of obs    =      5,760
                                   LR chi2(10)       =      160.85
                                   Prob > chi2        =      0.0000
Log likelihood = -533.39536        Pseudo R2       =      0.1310

```

| RehabUsed2            | Odds Ratio | Std. Err. | z     | P> z  | [95% Conf. Interval] |
|-----------------------|------------|-----------|-------|-------|----------------------|
| strokew1              |            |           |       |       |                      |
| stroke                | 3.023982   | 1.210921  | 2.76  | 0.006 | 1.37951 6.628779     |
| zMoca                 | .9380939   | .0918678  | -0.65 | 0.514 | .7742619 1.136592    |
| age                   | .9660501   | .0117159  | -2.85 | 0.004 | .9433582 .9892879    |
| sex                   |            |           |       |       |                      |
| Female                | .98947     | .1873641  | -0.06 | 0.955 | .6826857 1.434117    |
| edu3                  |            |           |       |       |                      |
| secondary edu         | 1.573118   | .3827416  | 1.86  | 0.063 | .9764793 2.53431     |
| third level edu       | 2.043387   | .5582288  | 2.62  | 0.009 | 1.196224 3.490509    |
| emp2                  |            |           |       |       |                      |
| Employed              | .4544699   | .1282731  | -2.79 | 0.005 | .2613698 .7902326    |
| medcard               |            |           |       |       |                      |
| medcard/gp visit card | 2.865971   | .6841755  | 4.41  | 0.000 | 1.795022 4.575872    |
| Disability2           |            |           |       |       |                      |
| Disability            | 3.386041   | .7127287  | 5.79  | 0.000 | 2.241416 5.115191    |
| MHcesd_capi           | 1.048094   | .0098247  | 5.01  | 0.000 | 1.029013 1.067528    |
| _cons                 | .0442429   | .0373463  | -3.69 | 0.000 | .0084591 .2313985    |

**\*6b.Rehab services used (2 services) - model including cover instead of medical card\***

```
. logit RehabUsed2 i.strokew1 zMoca age i.sex i.edu3 i.emp2 i.cover i.Disability2 MHcesd_capi, or
nolog
```

```
Logistic regression           Number of obs   =      5,756
                              LR chi2(12)       =      155.91
                              Prob > chi2           =      0.0000
Log likelihood = -531.98916    Pseudo R2       =      0.1278
```

| RehabUsed2        | Odds Ratio | Std. Err. | z     | P> z  | [95% Conf. Interval] |          |
|-------------------|------------|-----------|-------|-------|----------------------|----------|
| -----             |            |           |       |       |                      |          |
| strokew1          |            |           |       |       |                      |          |
| stroke            | 3.073338   | 1.229636  | 2.81  | 0.005 | 1.402963             | 6.732468 |
| zMoca             | .9343493   | .0918771  | -0.69 | 0.490 | .7705632             | 1.132949 |
| age               | .9677374   | .0123483  | -2.57 | 0.010 | .9438352             | .9922449 |
|                   |            |           |       |       |                      |          |
| sex               |            |           |       |       |                      |          |
| Female            | .9839554   | .1866755  | -0.09 | 0.932 | .6784002             | 1.427134 |
|                   |            |           |       |       |                      |          |
| edu3              |            |           |       |       |                      |          |
| secondary edu     | 1.574888   | .3905416  | 1.83  | 0.067 | .9686534             | 2.560538 |
| third level edu   | 2.057317   | .5810903  | 2.55  | 0.011 | 1.182711             | 3.578685 |
|                   |            |           |       |       |                      |          |
| emp2              |            |           |       |       |                      |          |
| Employed          | .458917    | .1297986  | -2.75 | 0.006 | .2636228             | .7988868 |
|                   |            |           |       |       |                      |          |
| cover             |            |           |       |       |                      |          |
| Medical card only | 3.923297   | 1.912195  | 2.80  | 0.005 | 1.509315             | 10.19818 |
| Insurance only    | 1.38805    | .6902024  | 0.66  | 0.510 | .5237797             | 3.678423 |
| Dual cover        | 3.428856   | 1.772495  | 2.38  | 0.017 | 1.244898             | 9.444193 |
|                   |            |           |       |       |                      |          |
| Disability2       |            |           |       |       |                      |          |
| Disability        | 3.348344   | .7102538  | 5.70  | 0.000 | 2.209391             | 5.074436 |
| MHcesd_capi       | 1.046956   | .0099264  | 4.84  | 0.000 | 1.02768              | 1.066593 |
| _cons             | .0305717   | .0293373  | -3.63 | 0.000 | .0046611             | .2005168 |
| -----             |            |           |       |       |                      |          |

\*\*\*\*\*



**4. Multiple regressions including long-term illness (longterm)  
as a covariate; attempt to measure other non-CVD conditions  
which could impact HSU**

. tab longterm

| longterm             | Freq. | Percent | Cum.   |
|----------------------|-------|---------|--------|
| No illness           | 5,039 | 61.68   | 61.68  |
| Yes longterm illness | 3,131 | 38.32   | 100.00 |
| Total                | 8,170 | 100.00  |        |

**\*1a.GP visits - original model\***

. nbreg gpvisits i.strokew1 zMoca age i.sex i.edu3 i.emp2 i.medcard i.Disability2 MHcesd\_capi,  
irr nolog

|                              |               |   |         |
|------------------------------|---------------|---|---------|
| Negative binomial regression | Number of obs | = | 5,753   |
|                              | LR chi2(10)   | = | 1364.13 |
| Dispersion = mean            | Prob > chi2   | = | 0.0000  |
| Log likelihood = -13146.315  | Pseudo R2     | = | 0.0493  |

| gpvisits              | IRR      | Std. Err. | z     | P> z  | [95% Conf. Interval] |
|-----------------------|----------|-----------|-------|-------|----------------------|
| strokew1              |          |           |       |       |                      |
| stroke                | 1.26931  | .1088749  | 2.78  | 0.005 | 1.072892 1.501687    |
| zMoca                 | 1.066888 | .0136849  | 5.05  | 0.000 | 1.040401 1.09405     |
| age                   | 1.003391 | .0016149  | 2.10  | 0.035 | 1.000231 1.006561    |
| sex                   |          |           |       |       |                      |
| Female                | 1.016083 | .0235785  | 0.69  | 0.492 | .9709047 1.063363    |
| edu3                  |          |           |       |       |                      |
| secondary edu         | .9953264 | .0292704  | -0.16 | 0.873 | .9395795 1.054381    |
| third level edu       | .9537152 | .0318513  | -1.42 | 0.156 | .8932871 1.018231    |
| emp2                  |          |           |       |       |                      |
| Employed              | .8489824 | .0245915  | -5.65 | 0.000 | .8021266 .8985752    |
| medcard               |          |           |       |       |                      |
| medcard/gp visit card | 1.597204 | .0444586  | 16.82 | 0.000 | 1.512401 1.686762    |
| Disability2           |          |           |       |       |                      |
| Disability            | 1.434818 | .050219   | 10.32 | 0.000 | 1.339691 1.5367      |
| MHcesd_capi           | 1.018779 | .0016563  | 11.44 | 0.000 | 1.015538 1.02203     |

|             |  |           |          |      |       |           |           |
|-------------|--|-----------|----------|------|-------|-----------|-----------|
| _cons       |  | 2.029435  | .225706  | 6.36 | 0.000 | 1.631953  | 2.523728  |
| -----+----- |  |           |          |      |       |           |           |
| /lnalpha    |  | -.8281074 | .0318193 |      |       | -.8904721 | -.7657428 |
| -----+----- |  |           |          |      |       |           |           |
| alpha       |  | .4368753  | .0139011 |      |       | .4104619  | .4649884  |
| -----       |  |           |          |      |       |           |           |

LR test of alpha=0: chibar2(01) = 4075.71                      Prob >= chibar2 = 0.000

**\*1b.GP visits - model including longterm illness\***

```
. nbreg gpvisits i.strokew1 zMoca i.longterm age i.sex i.edu3 i.emp2 i.medcard i.Disability2
MHcesd_capi, irr nolog
```

```
Negative binomial regression      Number of obs   =      5,748
                                  LR chi2(11)      =     1618.78
Dispersion      = mean           Prob > chi2     =      0.0000
Log likelihood = -13007.973      Pseudo R2      =      0.0586
```

| gpvisits              | IRR       | Std. Err. | z     | P> z  | [95% Conf. Interval] |           |
|-----------------------|-----------|-----------|-------|-------|----------------------|-----------|
| -----                 |           |           |       |       |                      |           |
| strokew1              |           |           |       |       |                      |           |
| stroke                | 1.203119  | .1004988  | 2.21  | 0.027 | 1.021424             | 1.417134  |
| zMoca                 | 1.072254  | .0134819  | 5.55  | 0.000 | 1.046153             | 1.099006  |
|                       |           |           |       |       |                      |           |
| longterm              |           |           |       |       |                      |           |
| Yes longterm illness  | 1.470992  | .0351196  | 16.17 | 0.000 | 1.403744             | 1.541461  |
| age                   | 1.004484  | .0015881  | 2.83  | 0.005 | 1.001376             | 1.007602  |
|                       |           |           |       |       |                      |           |
| sex                   |           |           |       |       |                      |           |
| Female                | 1.011344  | .0230472  | 0.49  | 0.621 | .9671661             | 1.05754   |
|                       |           |           |       |       |                      |           |
| edu3                  |           |           |       |       |                      |           |
| secondary edu         | .9970944  | .028727   | -0.10 | 0.920 | .9423506             | 1.055018  |
| third level edu       | .9426187  | .0308805  | -1.80 | 0.071 | .8839962             | 1.005129  |
|                       |           |           |       |       |                      |           |
| emp2                  |           |           |       |       |                      |           |
| Employed              | .8892008  | .0254868  | -4.10 | 0.000 | .8406248             | .9405838  |
|                       |           |           |       |       |                      |           |
| medcard               |           |           |       |       |                      |           |
| medcard/gp visit card | 1.544167  | .0423642  | 15.84 | 0.000 | 1.463328             | 1.629472  |
|                       |           |           |       |       |                      |           |
| Disability2           |           |           |       |       |                      |           |
| Disability            | 1.266007  | .0443783  | 6.73  | 0.000 | 1.181948             | 1.356045  |
| MHcesd_capi           | 1.015355  | .0016221  | 9.54  | 0.000 | 1.012181             | 1.018539  |
| _cons                 | 1.664557  | .1829528  | 4.64  | 0.000 | 1.341969             | 2.06469   |
| -----                 |           |           |       |       |                      |           |
| /lnalpha              | -.9043947 | .0327966  |       |       | -.9686748            | -.8401145 |
| -----                 |           |           |       |       |                      |           |
| alpha                 | .4047868  | .0132756  |       |       | .3795857             | .4316611  |
| -----                 |           |           |       |       |                      |           |

```
LR test of alpha=0: chibar2(01) = 3700.88      Prob >= chibar2 = 0.000
```

**\*2a. Emergency visits - original model\***

```
. nbreg emergency i.strokew1 zMoca age i.sex i.edu3 i.emp2 i.medcard i.Disability2 MHcesd_capi,
irr nolog
```

```
Negative binomial regression      Number of obs   =      5,757
                                   LR chi2(10)      =      136.19
Dispersion      = mean           Prob > chi2     =      0.0000
Log likelihood = -3156.5347      Pseudo R2      =      0.0211
```

| emergency             | IRR      | Std. Err. | z     | P> z  | [95% Conf. Interval] |          |
|-----------------------|----------|-----------|-------|-------|----------------------|----------|
| -----+-----           |          |           |       |       |                      |          |
| strokew1              |          |           |       |       |                      |          |
| stroke                | 1.562992 | .4085484  | 1.71  | 0.088 | .936402              | 2.608863 |
| zMoca                 | 1.055994 | .0455497  | 1.26  | 0.207 | .9703874             | 1.149152 |
| age                   | 1.000074 | .0053157  | 0.01  | 0.989 | .9897096             | 1.010547 |
|                       |          |           |       |       |                      |          |
| sex                   |          |           |       |       |                      |          |
| Female                | .9694865 | .0738441  | -0.41 | 0.684 | .83504               | 1.12558  |
|                       |          |           |       |       |                      |          |
| edu3                  |          |           |       |       |                      |          |
| secondary edu         | .981302  | .0952215  | -0.19 | 0.846 | .811345              | 1.186861 |
| third level edu       | 1.150641 | .1256091  | 1.29  | 0.199 | .9290065             | 1.42515  |
|                       |          |           |       |       |                      |          |
| emp2                  |          |           |       |       |                      |          |
| Employed              | .9343425 | .0892415  | -0.71 | 0.477 | .7748286             | 1.126696 |
|                       |          |           |       |       |                      |          |
| medcard               |          |           |       |       |                      |          |
| medcard/gp visit card | 1.425844 | .1318271  | 3.84  | 0.000 | 1.189525             | 1.709111 |
|                       |          |           |       |       |                      |          |
| Disability2           |          |           |       |       |                      |          |
| Disability            | 1.880549 | .1998814  | 5.94  | 0.000 | 1.526903             | 2.316103 |
| MHcesd_capi           | 1.021914 | .0050527  | 4.38  | 0.000 | 1.012059             | 1.031865 |
| _cons                 | .1416426 | .0518411  | -5.34 | 0.000 | .0691282             | .2902237 |
| -----+-----           |          |           |       |       |                      |          |
| /lnalpha              | 1.135652 | .078928   |       |       | .9809563             | 1.290348 |
| -----+-----           |          |           |       |       |                      |          |
| alpha                 | 3.113204 | .2457189  |       |       | 2.667005             | 3.634052 |
| -----+-----           |          |           |       |       |                      |          |

```
LR test of alpha=0: chibar2(01) = 644.50      Prob >= chibar2 = 0.000
```

**\*2b. Emergency visits - model including longterm illness\***

```
. nbreg emergency i.strokew1 zMoca i.longterm age i.sex i.edu3 i.emp2 i.medcard i.Disability2
MHcesd_capi, irr nolog
```

```
Negative binomial regression      Number of obs   =      5,752
                                  LR chi2(11)      =      192.59
Dispersion = mean                 Prob > chi2     =      0.0000
Log likelihood = -3125.4182       Pseudo R2      =      0.0299
```

| emergency             | IRR      | Std. Err. | z     | P> z  | [95% Conf. Interval] |          |
|-----------------------|----------|-----------|-------|-------|----------------------|----------|
| -----                 |          |           |       |       |                      |          |
| strokew1              |          |           |       |       |                      |          |
| stroke                | 1.437654 | .3707305  | 1.41  | 0.159 | .8672684             | 2.383171 |
| zMoca                 | 1.068789 | .0458264  | 1.55  | 0.121 | .9826412             | 1.162489 |
|                       |          |           |       |       |                      |          |
| longterm              |          |           |       |       |                      |          |
| Yes longterm illness  | 1.817805 | .1434494  | 7.57  | 0.000 | 1.557313             | 2.12187  |
| age                   | 1.001628 | .0053026  | 0.31  | 0.759 | .9912887             | 1.012075 |
|                       |          |           |       |       |                      |          |
| sex                   |          |           |       |       |                      |          |
| Female                | .9602327 | .0728892  | -0.53 | 0.593 | .8274916             | 1.114267 |
|                       |          |           |       |       |                      |          |
| edu3                  |          |           |       |       |                      |          |
| secondary edu         | .9717456 | .0939108  | -0.30 | 0.767 | .8040652             | 1.174394 |
| third level edu       | 1.122789 | .1220436  | 1.07  | 0.287 | .9073509             | 1.38938  |
|                       |          |           |       |       |                      |          |
| emp2                  |          |           |       |       |                      |          |
| Employed              | 1.013597 | .0973149  | 0.14  | 0.888 | .8397342             | 1.223457 |
|                       |          |           |       |       |                      |          |
| medcard               |          |           |       |       |                      |          |
| medcard/gp visit card | 1.357385 | .125377   | 3.31  | 0.001 | 1.13261              | 1.626767 |
|                       |          |           |       |       |                      |          |
| Disability2           |          |           |       |       |                      |          |
| Disability            | 1.559045 | .1682998  | 4.11  | 0.000 | 1.261743             | 1.926399 |
| MHcesd_capi           | 1.017002 | .0050314  | 3.41  | 0.001 | 1.007189             | 1.026912 |
| _cons                 | .1036375 | .0380454  | -6.18 | 0.000 | .0504708             | .2128106 |
| -----                 |          |           |       |       |                      |          |
| /lnalpha              | 1.072501 | .0801795  |       |       | .9153518             | 1.22965  |
| -----                 |          |           |       |       |                      |          |
| alpha                 | 2.92268  | .2343391  |       |       | 2.497654             | 3.420032 |
| -----                 |          |           |       |       |                      |          |

```
LR test of alpha=0: chibar2(01) = 610.75      Prob >= chibar2 = 0.000
```

**\*3a.Nights in hospital - original model\***

```
. nbreg nights i.strokew1 zMoca age i.sex i.edu3 i.emp2 i.medcard i.Disability2 MHcesd_capi, irr
nolog
```

```
Negative binomial regression      Number of obs   =      5,758
                                   LR chi2(10)      =      100.85
Dispersion = mean                 Prob > chi2     =      0.0000
Log likelihood = -4043.7539       Pseudo R2      =      0.0123
```

| nights                | IRR      | Std. Err. | z     | P> z  | [95% Conf. Interval] |          |
|-----------------------|----------|-----------|-------|-------|----------------------|----------|
| strokew1              |          |           |       |       |                      |          |
| stroke                | 1.930541 | .8994416  | 1.41  | 0.158 | .7746455             | 4.811217 |
| zMoca                 | 1.047743 | .0662378  | 0.74  | 0.461 | .92564               | 1.185952 |
| age                   | 1.021044 | .0088188  | 2.41  | 0.016 | 1.003905             | 1.038475 |
| sex                   |          |           |       |       |                      |          |
| Female                | .9332921 | .1110405  | -0.58 | 0.562 | .7391694             | 1.178396 |
| edu3                  |          |           |       |       |                      |          |
| secondary edu         | 1.233323 | .1891828  | 1.37  | 0.172 | .9130801             | 1.665885 |
| third level edu       | 1.251192 | .2208183  | 1.27  | 0.204 | .8853166             | 1.768274 |
| emp2                  |          |           |       |       |                      |          |
| Employed              | .7813591 | .1203808  | -1.60 | 0.109 | .5777096             | 1.056798 |
| medcard               |          |           |       |       |                      |          |
| medcard/gp visit card | 1.518647 | .2199657  | 2.88  | 0.004 | 1.143315             | 2.017193 |
| Disability2           |          |           |       |       |                      |          |
| Disability            | 2.106449 | .3963532  | 3.96  | 0.000 | 1.456758             | 3.045892 |
| MHcesd_capi           | 1.0189   | .0088877  | 2.15  | 0.032 | 1.001628             | 1.036469 |
| _cons                 | .0973825 | .0587259  | -3.86 | 0.000 | .0298655             | .3175357 |
| /lnalpha              | 2.852873 | .0487549  |       |       | 2.757315             | 2.948431 |
| alpha                 | 17.33752 | .8452886  |       |       | 15.75748             | 19.07599 |

```
LR test of alpha=0: chibar2(01) = 1.0e+04      Prob >= chibar2 = 0.000
```

**\*3b.Nights in hospital - model including longterm illness\***

. nbreg nights i.strokew1 zMoca i.longterm age i.sex i.edu3 i.emp2 i.medcard i.Disability2  
MHcesd\_capi, irr nolog

```
Negative binomial regression      Number of obs   =      5,753
                                   LR chi2(11)      =      136.55
Dispersion   = mean              Prob > chi2     =      0.0000
Log likelihood = -4019.3393      Pseudo R2      =      0.0167
```

| nights                | IRR      | Std. Err. | z     | P> z  | [95% Conf. Interval] |          |
|-----------------------|----------|-----------|-------|-------|----------------------|----------|
| strokew1              |          |           |       |       |                      |          |
| stroke                | 1.792692 | .8231025  | 1.27  | 0.204 | .7289243             | 4.408889 |
| zMoca                 | 1.064631 | .0674806  | 0.99  | 0.323 | .9402574             | 1.205457 |
| longterm              |          |           |       |       |                      |          |
| Yes longterm illness  | 2.078446 | .2570556  | 5.92  | 0.000 | 1.631041             | 2.648577 |
| age                   | 1.025841 | .0088873  | 2.94  | 0.003 | 1.00857              | 1.043409 |
| sex                   |          |           |       |       |                      |          |
| Female                | .9534505 | .112887   | -0.40 | 0.687 | .7559922             | 1.202483 |
| edu3                  |          |           |       |       |                      |          |
| secondary edu         | 1.204587 | .183036   | 1.22  | 0.221 | .8943318             | 1.622473 |
| third level edu       | 1.156953 | .2031283  | 0.83  | 0.406 | .8201041             | 1.63216  |
| emp2                  |          |           |       |       |                      |          |
| Employed              | .8838343 | .1365227  | -0.80 | 0.424 | .6529634             | 1.196335 |
| medcard               |          |           |       |       |                      |          |
| medcard/gp visit card | 1.4375   | .2066904  | 2.52  | 0.012 | 1.084472             | 1.90545  |
| Disability2           |          |           |       |       |                      |          |
| Disability            | 1.680238 | .3195497  | 2.73  | 0.006 | 1.157413             | 2.439233 |
| MHcesd_capi           | 1.012504 | .0086243  | 1.46  | 0.145 | .995741              | 1.029549 |
| _cons                 | .054652  | .0333283  | -4.77 | 0.000 | .0165394             | .1805891 |
| /lnalpha              | 2.81531  | .0491421  |       |       | 2.718993             | 2.911627 |
| alpha                 | 16.69835 | .8205916  |       |       | 15.16504             | 18.38668 |

LR test of alpha=0: chibar2(01) = 9877.93                      Prob >= chibar2 = 0.000

**\*4a.Outpatient visits - original model\***

```
. nbreg outpatient i.strokew1 zMoca age i.sex i.edu3 i.emp2 i.medcard i.Disability2 MHcesd_capi,
irr nolog
```

```
Negative binomial regression      Number of obs   =      5,758
                                   LR chi2(10)      =      320.19
Dispersion = mean                 Prob > chi2     =      0.0000
Log likelihood = -8323.6887       Pseudo R2      =      0.0189
```

| outpatient            | IRR      | Std. Err. | z     | P> z  | [95% Conf. Interval] |          |
|-----------------------|----------|-----------|-------|-------|----------------------|----------|
| -----+-----           |          |           |       |       |                      |          |
| strokew1              |          |           |       |       |                      |          |
| stroke                | 1.491691 | .2666236  | 2.24  | 0.025 | 1.050838             | 2.117493 |
| zMoca                 | .9233992 | .0251754  | -2.92 | 0.003 | .8753515             | .9740841 |
| age                   | .9991229 | .0033752  | -0.26 | 0.795 | .9925296             | 1.00576  |
|                       |          |           |       |       |                      |          |
| sex                   |          |           |       |       |                      |          |
| Female                | .970144  | .0461093  | -0.64 | 0.524 | .883853              | 1.06486  |
|                       |          |           |       |       |                      |          |
| edu3                  |          |           |       |       |                      |          |
| secondary edu         | .9581131 | .0588409  | -0.70 | 0.486 | .8494575             | 1.080667 |
| third level edu       | 1.048307 | .072027   | 0.69  | 0.492 | .9162296             | 1.199424 |
|                       |          |           |       |       |                      |          |
| emp2                  |          |           |       |       |                      |          |
| Employed              | .6883726 | .0408307  | -6.30 | 0.000 | .6128225             | .7732367 |
|                       |          |           |       |       |                      |          |
| medcard               |          |           |       |       |                      |          |
| medcard/gp visit card | 1.308491 | .0735854  | 4.78  | 0.000 | 1.17193              | 1.460964 |
|                       |          |           |       |       |                      |          |
| Disability2           |          |           |       |       |                      |          |
| Disability            | 1.786977 | .12974    | 8.00  | 0.000 | 1.549955             | 2.060244 |
| MHcesd_capi           | 1.021031 | .0035114  | 6.05  | 0.000 | 1.014172             | 1.027936 |
| _cons                 | 1.027715 | .2380878  | 0.12  | 0.906 | .6526458             | 1.618334 |
| -----+-----           |          |           |       |       |                      |          |
| /lnalpha              | .7918733 | .0349612  |       |       | .7233506             | .860396  |
| -----+-----           |          |           |       |       |                      |          |
| alpha                 | 2.207528 | .0771779  |       |       | 2.061328             | 2.364097 |
| -----+-----           |          |           |       |       |                      |          |

```
LR test of alpha=0: chibar2(01) = 5125.52      Prob >= chibar2 = 0.000
```



**\*4b.Outpatient visits - model including longterm illness\***

```
. nbreg outpatient i.strokew1 zMoca i.longterm age i.sex i.edu3 i.emp2 i.medcard i.Disability2
MHcesd_capi, irr nolog
```

```
Negative binomial regression          Number of obs   =      5,753
                                      LR chi2(11)     =      643.70
Dispersion = mean                    Prob > chi2     =      0.0000
Log likelihood = -8151.6442          Pseudo R2      =      0.0380
```

| outpatient            | IRR      | Std. Err. | z     | P> z  | [95% Conf. Interval] |          |
|-----------------------|----------|-----------|-------|-------|----------------------|----------|
| -----                 |          |           |       |       |                      |          |
| strokew1              |          |           |       |       |                      |          |
| stroke                | 1.410321 | .2403202  | 2.02  | 0.044 | 1.009886             | 1.969534 |
| zMoca                 | .9332813 | .0245787  | -2.62 | 0.009 | .8863301             | .9827196 |
|                       |          |           |       |       |                      |          |
| longterm              |          |           |       |       |                      |          |
| Yes longterm illness  | 2.401465 | .1150536  | 18.29 | 0.000 | 2.186228             | 2.637893 |
| age                   | 1.00328  | .0032902  | 1.00  | 0.318 | .996852              | 1.009749 |
|                       |          |           |       |       |                      |          |
| sex                   |          |           |       |       |                      |          |
| Female                | .9628969 | .0444146  | -0.82 | 0.412 | .879665              | 1.054004 |
|                       |          |           |       |       |                      |          |
| edu3                  |          |           |       |       |                      |          |
| secondary edu         | .9677825 | .0574478  | -0.55 | 0.581 | .86149               | 1.08719  |
| third level edu       | 1.032862 | .0685443  | 0.49  | 0.626 | .9068876             | 1.176335 |
|                       |          |           |       |       |                      |          |
| emp2                  |          |           |       |       |                      |          |
| Employed              | .7984812 | .0466383  | -3.85 | 0.000 | .7121101             | .8953282 |
|                       |          |           |       |       |                      |          |
| medcard               |          |           |       |       |                      |          |
| medcard/gp visit card | 1.216473 | .0668381  | 3.57  | 0.000 | 1.09228              | 1.354788 |
|                       |          |           |       |       |                      |          |
| Disability2           |          |           |       |       |                      |          |
| Disability            | 1.41033  | .0999349  | 4.85  | 0.000 | 1.227454             | 1.620452 |
| MHcesd_capi           | 1.013218 | .003349   | 3.97  | 0.000 | 1.006675             | 1.019803 |
| _cons                 | .5439719 | .1236483  | -2.68 | 0.007 | .3484119             | .8492979 |
| -----                 |          |           |       |       |                      |          |
| /lnalpha              | .6490419 | .0367526  |       |       | .5770082             | .7210756 |
| -----                 |          |           |       |       |                      |          |
| alpha                 | 1.913706 | .0703336  |       |       | 1.780703             | 2.056644 |
| -----                 |          |           |       |       |                      |          |

```
LR test of alpha=0: chibar2(01) = 4343.80          Prob >= chibar2 = 0.000
```

**\*5a.Rehab services used - 3 services (new variable: OT, Psychology and Physiotherapy)\***

. logit SSused3 i.strokew1 zMoca age i.sex i.edu3 i.emp2 i.medcard i.Disability2 MHcesd\_capi, or nolog

```

Logistic regression          Number of obs    =      5,760
                             LR chi2(10)          =      260.77
                             Prob > chi2          =      0.0000
Log likelihood = -1259.2078  Pseudo R2        =      0.0938
  
```

| SSused3               | Odds Ratio | Std. Err. | z     | P> z  | [95% Conf. Interval] |
|-----------------------|------------|-----------|-------|-------|----------------------|
| -----                 |            |           |       |       |                      |
| strokew1              |            |           |       |       |                      |
| stroke                | 1.247889   | .4231788  | 0.65  | 0.514 | .641978 2.42567      |
| zMoca                 | .9854331   | .0581176  | -0.25 | 0.804 | .8778617 1.106186    |
| age                   | .9876777   | .0072565  | -1.69 | 0.091 | .9735571 1.002003    |
| sex                   |            |           |       |       |                      |
| Female                | 1.139399   | .129593   | 1.15  | 0.251 | .9117204 1.423934    |
| edu3                  |            |           |       |       |                      |
| secondary edu         | 1.447394   | .2076175  | 2.58  | 0.010 | 1.092668 1.917278    |
| third level edu       | 1.763759   | .2863017  | 3.50  | 0.000 | 1.283122 2.424433    |
| emp2                  |            |           |       |       |                      |
| Employed              | .6002524   | .0949352  | -3.23 | 0.001 | .4402596 .8183875    |
| medcard               |            |           |       |       |                      |
| medcard/gp visit card | 2.697211   | .3800268  | 7.04  | 0.000 | 2.046369 3.555053    |
| Disability2           |            |           |       |       |                      |
| Disability            | 2.593357   | .3499073  | 7.06  | 0.000 | 1.990739 3.378394    |
| MHcesd_capi           | 1.039322   | .0066217  | 6.05  | 0.000 | 1.026425 1.052382    |
| _cons                 | .0424572   | .0217686  | -6.16 | 0.000 | .0155426 .1159789    |
| -----                 |            |           |       |       |                      |

**\*5b. Rehab services used (3 services) - model including longterm illness\***

. logit SSused3 i.strokew1 zMoca i.longterm age i.sex i.edu3 i.emp2 i.medcard i.Disability2  
MHcesd\_capi, or nolog

|                             |               |   |        |
|-----------------------------|---------------|---|--------|
| Logistic regression         | Number of obs | = | 5,755  |
|                             | LR chi2(11)   | = | 313.11 |
|                             | Prob > chi2   | = | 0.0000 |
| Log likelihood = -1232.7022 | Pseudo R2     | = | 0.1127 |

| SSused3               | Odds Ratio | Std. Err. | z     | P> z  | [95% Conf. Interval] |
|-----------------------|------------|-----------|-------|-------|----------------------|
| -----                 |            |           |       |       |                      |
| strokew1              |            |           |       |       |                      |
| stroke                | 1.15439    | .3893762  | 0.43  | 0.670 | .5959938 2.235955    |
| zMoca                 | .9964729   | .059103   | -0.06 | 0.952 | .8871128 1.119315    |
|                       |            |           |       |       |                      |
| longterm              |            |           |       |       |                      |
| Yes longterm illness  | 2.414493   | .2995352  | 7.11  | 0.000 | 1.893339 3.079099    |
| age                   | .9898175   | .0073056  | -1.39 | 0.166 | .9756019 1.00424     |
|                       |            |           |       |       |                      |
| sex                   |            |           |       |       |                      |
| Female                | 1.13947    | .1301702  | 1.14  | 0.253 | .9108858 1.425418    |
|                       |            |           |       |       |                      |
| edu3                  |            |           |       |       |                      |
| secondary edu         | 1.459999   | .2107668  | 2.62  | 0.009 | 1.100202 1.937461    |
| third level edu       | 1.748068   | .2855369  | 3.42  | 0.001 | 1.269169 2.407672    |
|                       |            |           |       |       |                      |
| emp2                  |            |           |       |       |                      |
| Employed              | .6657387   | .1061474  | -2.55 | 0.011 | .4870636 .9099591    |
|                       |            |           |       |       |                      |
| medcard               |            |           |       |       |                      |
| medcard/gp visit card | 2.516501   | .3551644  | 6.54  | 0.000 | 1.908373 3.318415    |
|                       |            |           |       |       |                      |
| Disability2           |            |           |       |       |                      |
| Disability            | 1.965227   | .2731058  | 4.86  | 0.000 | 1.496656 2.580497    |
| MHcesd_capi           | 1.033779   | .0066755  | 5.14  | 0.000 | 1.020778 1.046946    |
| _cons                 | .0256163   | .0133742  | -7.02 | 0.000 | .0092068 .0712731    |
| -----                 |            |           |       |       |                      |

**\*6a.Rehab services used - 2 services only (original variable: OT and Psychology) \***

. logit RehabUsed2 i.strokew1 zMoca age i.sex i.edu3 i.emp2 i.medcard i.Disability2 MHcesd\_capi,  
or nolog

```

Logistic regression                Number of obs    =      5,760
                                   LR chi2(10)       =      160.85
                                   Prob > chi2        =      0.0000
Log likelihood = -533.39536        Pseudo R2       =      0.1310

```

| RehabUsed2            | Odds Ratio | Std. Err. | z     | P> z  | [95% Conf. Interval] |
|-----------------------|------------|-----------|-------|-------|----------------------|
| -----                 |            |           |       |       |                      |
| strokew1              |            |           |       |       |                      |
| stroke                | 3.023982   | 1.210921  | 2.76  | 0.006 | 1.37951 6.628779     |
| zMoca                 | .9380939   | .0918678  | -0.65 | 0.514 | .7742619 1.136592    |
| age                   | .9660501   | .0117159  | -2.85 | 0.004 | .9433582 .9892879    |
|                       |            |           |       |       |                      |
| sex                   |            |           |       |       |                      |
| Female                | .98947     | .1873641  | -0.06 | 0.955 | .6826857 1.434117    |
|                       |            |           |       |       |                      |
| edu3                  |            |           |       |       |                      |
| secondary edu         | 1.573118   | .3827416  | 1.86  | 0.063 | .9764793 2.53431     |
| third level edu       | 2.043387   | .5582288  | 2.62  | 0.009 | 1.196224 3.490509    |
|                       |            |           |       |       |                      |
| emp2                  |            |           |       |       |                      |
| Employed              | .4544699   | .1282731  | -2.79 | 0.005 | .2613698 .7902326    |
|                       |            |           |       |       |                      |
| medcard               |            |           |       |       |                      |
| medcard/gp visit card | 2.865971   | .6841755  | 4.41  | 0.000 | 1.795022 4.575872    |
|                       |            |           |       |       |                      |
| Disability2           |            |           |       |       |                      |
| Disability            | 3.386041   | .7127287  | 5.79  | 0.000 | 2.241416 5.115191    |
| MHcesd_capi           | 1.048094   | .0098247  | 5.01  | 0.000 | 1.029013 1.067528    |
| _cons                 | .0442429   | .0373463  | -3.69 | 0.000 | .0084591 .2313985    |
| -----                 |            |           |       |       |                      |

**\*6b.Rehab services used (2 services) - model including longterm illness\***

. logit RehabUsed2 i.strokew1 zMoca i.longterm age i.sex i.edu3 i.emp2 i.medcard i.Disability2  
MHcesd\_capi, or nolog

```

Logistic regression                Number of obs   =       5,755
                                   LR chi2(11)       =       185.15
                                   Prob > chi2        =       0.0000
Log likelihood = -521.13046        Pseudo R2      =       0.1508
    
```

| RehabUsed2            | Odds Ratio | Std. Err. | z     | P> z  | [95% Conf. Interval] |
|-----------------------|------------|-----------|-------|-------|----------------------|
| -----                 |            |           |       |       |                      |
| strokew1              |            |           |       |       |                      |
| stroke                | 2.809574   | 1.118978  | 2.59  | 0.009 | 1.287151 6.132693    |
| zMoca                 | .9468643   | .0929152  | -0.56 | 0.578 | .7811957 1.147666    |
|                       |            |           |       |       |                      |
| longterm              |            |           |       |       |                      |
| Yes longterm illness  | 2.950673   | .678337   | 4.71  | 0.000 | 1.88034 4.630264     |
| age                   | .968969    | .0117659  | -2.60 | 0.009 | .9461805 .9923063    |
|                       |            |           |       |       |                      |
| sex                   |            |           |       |       |                      |
| Female                | .9991877   | .1894041  | -0.00 | 0.997 | .6891202 1.448769    |
|                       |            |           |       |       |                      |
| edu3                  |            |           |       |       |                      |
| secondary edu         | 1.583393   | .3870808  | 1.88  | 0.060 | .9806219 2.556677    |
| third level edu       | 2.005828   | .5500773  | 2.54  | 0.011 | 1.17182 3.433419     |
|                       |            |           |       |       |                      |
| emp2                  |            |           |       |       |                      |
| Employed              | .5127925   | .1452453  | -2.36 | 0.018 | .2943365 .8933862    |
|                       |            |           |       |       |                      |
| medcard               |            |           |       |       |                      |
| medcard/gp visit card | 2.61402    | .6224874  | 4.04  | 0.000 | 1.639112 4.16878     |
|                       |            |           |       |       |                      |
| Disability2           |            |           |       |       |                      |
| Disability            | 2.444502   | .5277837  | 4.14  | 0.000 | 1.601071 3.732246    |
| MHcesd_capi           | 1.042332   | .009845   | 4.39  | 0.000 | 1.023214 1.061808    |
| _cons                 | .0223162   | .0192626  | -4.41 | 0.000 | .0041105 .1211569    |
| -----                 |            |           |       |       |                      |
